# Supplementary material for: Design of a Schiff Base Complex of Copper Coated on Epoxy-Modified Core–Shell MNPs as an Environmentally Friendly and Novel Catalyst for the One-Pot Synthesis of Various Chromene-Annulated Heterocycles
Source: PubMed Central journal article supplement — ACS Omega. 2021 Sep 14;6(39):25608–22. doi: 10.1021/acsomega.1c03672 (PMC8495884; doi:10.1021/acsomega.1c03672), 2021-09-14
Supplement: ao1c03672_si_001.pdf [file ao1c03672_si_001.pdf]

## Supporting Information

### **Design of Schiff base complex of copper coated on epoxy modified core-shell MNPs as an environmentally friendly and novel catalyst for the one-pot synthesis of various chromene-annulated heterocycles**

Sobhan Rezayati<sup>a</sup>, Ali Ramazani<sup>a,b\*</sup>, Sami Sajjadifar<sup>c</sup>, Hamideh Aghahosseini<sup>a</sup>, Aram Rezaei<sup>d</sup>

<sup>a</sup>*Department of Chemistry, Faculty of Science, University of Zanjan, Zanjan 45371-38791, Iran*

<sup>b</sup>*Department of Biotechnology, Research Institute of Modern Biological Techniques (RIMBT), University of Zanjan, Zanjan 45371-38791, Iran*

<sup>c</sup>*Department of Chemistry, Payame Noor University, PO BOX 19395-4697, Iran, Tehran*

<sup>d</sup>*Nano Drug Delivery Research Center, Health Technology Institute, Kermanshah University of Medical Sciences, Kermanshah, Iran*

Corresponding author : [aliramazani@znu.ac.ir](mailto:aliramazani@znu.ac.ir); [aliramazani@gmail.com](mailto:aliramazani@gmail.com)

| <b>List of Contents</b>                                                                                                                                                        | <b>Page</b> |
|--------------------------------------------------------------------------------------------------------------------------------------------------------------------------------|-------------|
| <b>Figure S1.</b> FT-IR spectrum of 2-amino-4-(phenyl)-5,10-dioxo-5,10-dihydro-4 <i>H</i> -benzo[ <i>g</i> ]chromene-3-carbonitrile                                            | S6          |
| <b>Figure S2.</b> <sup>1</sup> H NMR spectrum of 2-amino-4-(phenyl)-5,10-dioxo-5,10-dihydro-4 <i>H</i> -benzo[ <i>g</i> ]chromene-3-carbonitrile                               | S7          |
| <b>Figure S3.</b> The expanded <sup>1</sup> H NMR spectrum of 2-amino-4-(phenyl)-5,10-dioxo-5,10-dihydro-4 <i>H</i> -benzo[ <i>g</i> ]chromene-3-carbonitrile                  | S8          |
| <b>Figure S4.</b> <sup>13</sup> C NMR spectrum of 2-amino-4-(phenyl)-5,10-dioxo-5,10-dihydro-4 <i>H</i> -benzo[ <i>g</i> ]chromene-3-carbonitrile                              | S9          |
| <b>Figure S5.</b> FT-IR spectrum of 2-amino-4-(4-nitrophenyl)-5,10-dioxo-5,10-dihydro-4 <i>H</i> -benzo[ <i>g</i> ]chromene-3-carbonitrile                                     | S10         |
| <b>Figure S6.</b> <sup>1</sup> H NMR spectrum of 2-amino-4-(4-nitrophenyl)-5,10-dioxo-5,10-dihydro-4 <i>H</i> -benzo[ <i>g</i> ]chromene-3-carbonitrile                        | S11         |
| <b>Figure S7.</b> The expanded <sup>1</sup> H NMR spectrum of 2-amino-4-(4-nitrophenyl)-5,10-dioxo-5,10-dihydro-4 <i>H</i> -benzo[ <i>g</i> ]chromene-3-carbonitrile           | S12         |
| <b>Figure S8.</b> <sup>13</sup> C NMR spectrum of 2-amino-4-(4-nitrophenyl)-5,10-dioxo-5,10-dihydro-4 <i>H</i> -benzo[ <i>g</i> ]chromene-3-carbonitrile                       | S13         |
| <b>Figure S9.</b> FT-IR spectrum of 2-amino-4-(4-methylphenyl)-5,10-dioxo-5,10-dihydro-4 <i>H</i> -benzo[ <i>g</i> ]chromene-3-carbonitrile                                    | S14         |
| <b>Figure S10.</b> <sup>1</sup> H NMR spectrum of 2-amino-4-(4-methylphenyl)-5,10-dioxo-5,10-dihydro-4 <i>H</i> -benzo[ <i>g</i> ]chromene-3-carbonitrile                      | S15         |
| <b>Figure S11.</b> The expanded <sup>1</sup> H NMR spectrum of 2-amino-4-(4-methylphenyl)-5,10-dioxo-5,10-dihydro-4 <i>H</i> -benzo[ <i>g</i> ]chromene-3-carbonitrile         | S16         |
| <b>Figure S12.</b> <sup>13</sup> C NMR spectrum of 2-amino-4-(4-methylphenyl)-5,10-dioxo-5,10-dihydro-4 <i>H</i> -benzo[ <i>g</i> ]chromene-3-carbonitrile                     | S17         |
| <b>Figure S13.</b> FT-IR spectrum of 2-amino-4-(4-chloro-3-nitrophenyl)-5,10-dioxo-5,10-dihydro-4 <i>H</i> -benzo[ <i>g</i> ]chromene-3-carbonitrile                           | S18         |
| <b>Figure S14.</b> <sup>1</sup> H NMR spectrum of 2-amino-4-(4-chloro-3-nitrophenyl)-5,10-dioxo-5,10-dihydro-4 <i>H</i> -benzo[ <i>g</i> ]chromene-3-carbonitrile              | S19         |
| <b>Figure S15.</b> The expanded <sup>1</sup> H NMR spectrum of 2-amino-4-(4-chloro-3-nitrophenyl)-5,10-dioxo-5,10-dihydro-4 <i>H</i> -benzo[ <i>g</i> ]chromene-3-carbonitrile | S20         |

|                                                                                                                                                                            |     |
|----------------------------------------------------------------------------------------------------------------------------------------------------------------------------|-----|
| <b>Figure S16.</b> <sup>13</sup> C NMR spectrum of 2-amino-4-(4-chloro-3-nitrophenyl)-5,10-dioxo-5,10-dihydro-4 <i>H</i> -benzo[ <i>g</i> ]chromene-3-carbonitrile         | S21 |
| <b>Figure S17.</b> FT-IR spectrum of 2-amino-4-(2,4-dichlorophenyl)-5,10-dioxo-5,10-dihydro-4 <i>H</i> -benzo[ <i>g</i> ]chromene-3 carbonitrile                           | S22 |
| <b>Figure S18.</b> <sup>1</sup> H NMR spectrum of 2-amino-4-(2,4-dichlorophenyl)-5,10-dioxo-5,10-dihydro-4 <i>H</i> -benzo[ <i>g</i> ]chromene-3 carbonitrile              | S23 |
| <b>Figure S19.</b> The expanded <sup>1</sup> H NMR spectrum of 2-amino-4-(2,4-dichlorophenyl)-5,10-dioxo-5,10-dihydro-4 <i>H</i> -benzo[ <i>g</i> ]chromene-3 carbonitrile | S24 |
| <b>Figure S20.</b> <sup>13</sup> C NMR spectrum of 2-amino-4-(2,4-dichlorophenyl)-5,10-dioxo-5,10-dihydro-4 <i>H</i> -benzo[ <i>g</i> ]chromene-3 carbonitrile             | S25 |
| <b>Figure S21.</b> FT-IR spectrum of 2-amino-4-(4-(dimethylamino) phenyl)-5,10-dioxo-5,10-dihydro-4 <i>H</i> benzo[ <i>g</i> ]chromene-3-carbonitrile                      | S26 |
| <b>Figure S22.</b> <sup>1</sup> H NMR spectrum of 2-amino-4-(4-(dimethylamino) phenyl)-5,10-dioxo-5,10-dihydro-4 <i>H</i> benzo[ <i>g</i> ]chromene-3-carbonitrile         | S27 |
| <b>Figure S23.</b> The expanded <sup>1</sup> H NMR of 2-amino-4-(4-(dimethylamino) phenyl)-5,10-dioxo-5,10-dihydro-4 <i>H</i> benzo[ <i>g</i> ]chromene-3-carbonitrile     | S28 |
| <b>Figure S24.</b> <sup>13</sup> C NMR spectrum of 2-amino-4-(4-(dimethylamino) phenyl)-5,10-dioxo-5,10-dihydro-4 <i>H</i> benzo[ <i>g</i> ]chromene-3-carbonitrile        | S29 |
| <b>Figure S25.</b> FT-IR spectrum of 2-amino-4-(furan-2-yl)-5,10-dioxo-5,10-dihydro-4 <i>H</i> -benzo[ <i>g</i> ]chromene-3-carbonitrile                                   | S30 |
| <b>Figure S26.</b> <sup>1</sup> H NMR spectrum of 2-amino-4-(furan-2-yl)-5,10-dioxo-5,10-dihydro-4 <i>H</i> -benzo[ <i>g</i> ]chromene-3-carbonitrile                      | S31 |
| <b>Figure S27.</b> The expanded <sup>1</sup> H NMR spectrum of 2-amino-4-(furan-2-yl)-5,10-dioxo-5,10-dihydro-4 <i>H</i> -benzo[ <i>g</i> ]chromene-3-carbonitrile         | S32 |
| <b>Figure S28.</b> <sup>13</sup> C NMR spectrum of 2-amino-4-(furan-2-yl)-5,10-dioxo-5,10-dihydro-4 <i>H</i> -benzo[ <i>g</i> ]chromene-3-carbonitrile                     | S33 |
| <b>Figure S29.</b> FT-IR spectrum of 2-amino-4-(4-cyanophenyl)-5,10-dioxo-5,10-dihydro-4 <i>H</i> -benzo[ <i>g</i> ]chromene-3-carbonitrile                                | S34 |
| <b>Figure S30.</b> <sup>1</sup> H NMR spectrum of 2-amino-4-(4-cyanophenyl)-5,10-dioxo-5,10-dihydro-4 <i>H</i> -benzo[ <i>g</i> ]chromene-3-carbonitrile                   | S35 |
| <b>Figure S31.</b> <sup>13</sup> C NMR spectrum of 2-amino-4-(4-cyanophenyl)-5,10-dioxo-5,10-dihydro-4 <i>H</i> -benzo[ <i>g</i> ]chromene-3-carbonitrile                  | S36 |

|                                                                                                                                                                      |     |
|----------------------------------------------------------------------------------------------------------------------------------------------------------------------|-----|
| <b>Figure S32.</b> FT-IR spectrum of 2-amino-4-(1-naphtyl)-5,10-dioxo-5,10-dihydro-4 <i>H</i> -benzo[ <i>g</i> ]chromene-3-carbonitrile                              | S37 |
| <b>Figure S33.</b> <sup>1</sup> H NMR spectrum of 2-amino-4-(1-naphtyl)-5,10-dioxo-5,10-dihydro-4 <i>H</i> -benzo[ <i>g</i> ]chromene-3-carbonitrile                 | S38 |
| <b>Figure S34.</b> The expanded <sup>1</sup> H NMR spectrum of 2-amino-4-(1-naphtyl)-5,10-dioxo-5,10-dihydro-4 <i>H</i> -benzo[ <i>g</i> ]chromene-3-carbonitrile    | S39 |
| <b>Figure S35.</b> <sup>13</sup> C NMR spectrum of 2-amino-4-(1-naphtyl)-5,10-dioxo-5,10-dihydro-4 <i>H</i> -benzo[ <i>g</i> ]chromene-3-carbonitrile                | S40 |
| <b>Figure S36.</b> FT-IR spectrum of 2-amino-4-(2-naphtyl)-5,10-dioxo-5,10-dihydro-4 <i>H</i> -benzo[ <i>g</i> ]chromene-3-carbonitrile                              | S41 |
| <b>Figure S37.</b> <sup>1</sup> H NMR spectrum of 2-amino-4-(2-naphtyl)-5,10-dioxo-5,10-dihydro-4 <i>H</i> -benzo[ <i>g</i> ]chromene-3-carbonitrile                 | S42 |
| <b>Figure S38.</b> The expanded <sup>1</sup> H NMR spectrum of 2-amino-4-(2-naphtyl)-5,10-dioxo-5,10-dihydro-4 <i>H</i> -benzo[ <i>g</i> ]chromene-3-carbonitrile    | S43 |
| <b>Figure S39.</b> <sup>13</sup> C NMR spectrum of 2-amino-4-(2-naphtyl)-5,10-dioxo-5,10-dihydro-4 <i>H</i> -benzo[ <i>g</i> ]chromene-3-carbonitrile                | S44 |
| <b>Figure S40.</b> FT-IR spectrum of 2-amino-4-(pyridin-3-yl)-5,10-dioxo-5,10-dihydro-4 <i>H</i> -benzo[ <i>g</i> ]chromene-3-carbonitrile                           | S45 |
| <b>Figure S41.</b> <sup>1</sup> H NMR spectrum of 2-amino-4-(pyridin-3-yl)-5,10-dioxo-5,10-dihydro-4 <i>H</i> -benzo[ <i>g</i> ]chromene-3-carbonitrile              | S46 |
| <b>Figure S42.</b> The expanded <sup>1</sup> H NMR spectrum of 2-amino-4-(pyridin-3-yl)-5,10-dioxo-5,10-dihydro-4 <i>H</i> -benzo[ <i>g</i> ]chromene-3-carbonitrile | S47 |
| <b>Figure S43.</b> <sup>13</sup> C NMR spectrum of 2-amino-4-(pyridin-3-yl)-5,10-dioxo-5,10-dihydro-4 <i>H</i> -benzo[ <i>g</i> ]chromene-3-carbonitrile             | S48 |
| <b>Figure S44.</b> FT-IR spectrum of 3-amino-1-phenyl-1 <i>H</i> -benzo[ <i>f</i> ]chromene-2-carbonitrile                                                           | S49 |
| <b>Figure S45.</b> <sup>1</sup> H NMR spectrum of 3-amino-1-phenyl-1 <i>H</i> -benzo[ <i>f</i> ]chromene-2-carbonitrile                                              | S50 |
| <b>Figure S46.</b> The expanded <sup>1</sup> H NMR spectrum of 3-amino-1-phenyl-1 <i>H</i> -benzo[ <i>f</i> ]chromene-2-carbonitrile                                 | S51 |
| <b>Figure S47.</b> <sup>13</sup> C NMR spectrum of 3-amino-1-phenyl-1 <i>H</i> -benzo[ <i>f</i> ]chromene-2-carbonitrile                                             | S52 |

|                                                                                                                               |     |
|-------------------------------------------------------------------------------------------------------------------------------|-----|
| <b>Figure S48.</b> FT-IR spectrum of 3-amino-1-(4-cyanophenyl)-1H-benzo[f]chromene-2-carbonitrile                             | S53 |
| <b>Figure S49.</b> <sup>1</sup> H NMR spectrum of 3-amino-1-(4-cyanophenyl)-1H-benzo[f]chromene-2-carbonitrile                | S54 |
| <b>Figure S50.</b> <sup>13</sup> C NMR spectrum of 3-amino-1-(4-cyanophenyl)-1H-benzo[f]chromene-2-carbonitrile               | S55 |
| <b>Figure S51.</b> FT-IR spectrum of 2-amino-7-hydroxy-4-phenyl-4Hchromene-3-carbonitrile                                     | S56 |
| <b>Figure S52.</b> <sup>1</sup> H NMR spectrum of 2-amino-7-hydroxy-4-phenyl-4Hchromene-3-carbonitrile                        | S57 |
| <b>Figure S53.</b> <sup>1</sup> H NMR expand spectrum of 2-Amino-7-hydroxy-4-phenyl-4Hchromene-3-carbonitrile                 | S58 |
| <b>Figure S54.</b> <sup>13</sup> C NMR spectrum of 2-amino-7-hydroxy-4-phenyl-4Hchromene-3-carbonitrile                       | S59 |
| <b>Figure S55.</b> FT-IR spectrum of 2-amino-7-hydroxy-4-(3-nitrophenyl)-4H-chromene-3-carbonitrile                           | S60 |
| <b>Figure S56.</b> <sup>1</sup> H NMR spectrum of 2-amino-7-hydroxy-4-(3-nitrophenyl)-4H-chromene-3-carbonitrile              | S61 |
| <b>Figure S57.</b> The expanded <sup>1</sup> H NMR spectrum of 2-amino-7-hydroxy-4-(3-nitrophenyl)-4H-chromene-3-carbonitrile | S62 |
| <b>Figure S58.</b> <sup>13</sup> C NMR spectrum of 2-amino-7-hydroxy-4-(3-nitrophenyl)-4H-chromene-3-carbonitrile             | S63 |

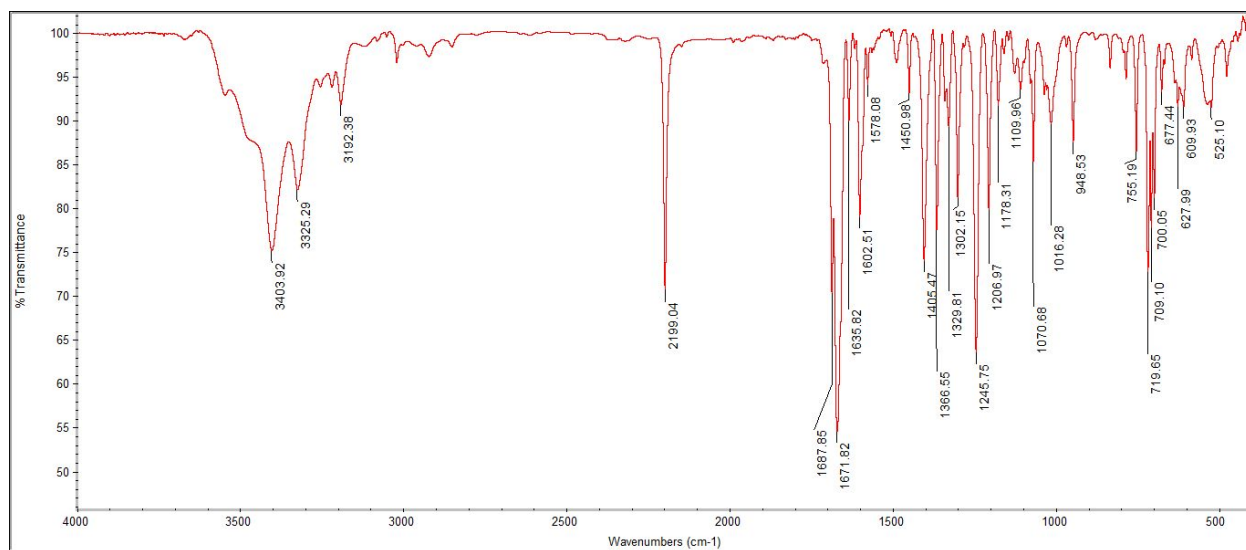

**Figure S1.** FT-IR spectrum of 2-amino-4-(phenyl)-5,10-dioxo-5,10-dihydro-4H-benzo[g]chromene-3-carbonitrile

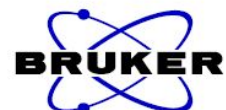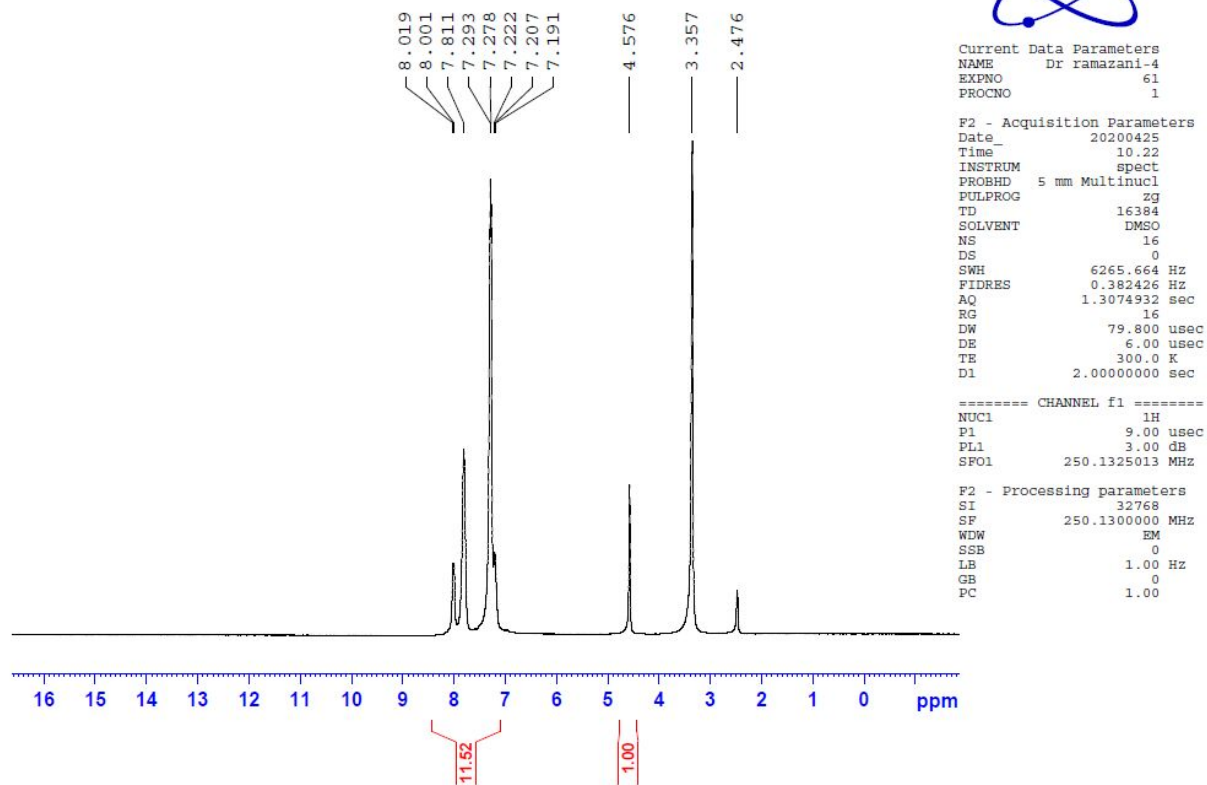

**Figure S2.**  $^1\text{H}$  NMR spectrum of 2-amino-4-(phenyl)-5,10-dioxo-5,10-dihydro-4*H*-benzo[*g*]chromene-3-carbonitrile

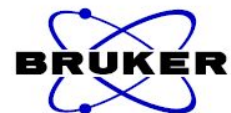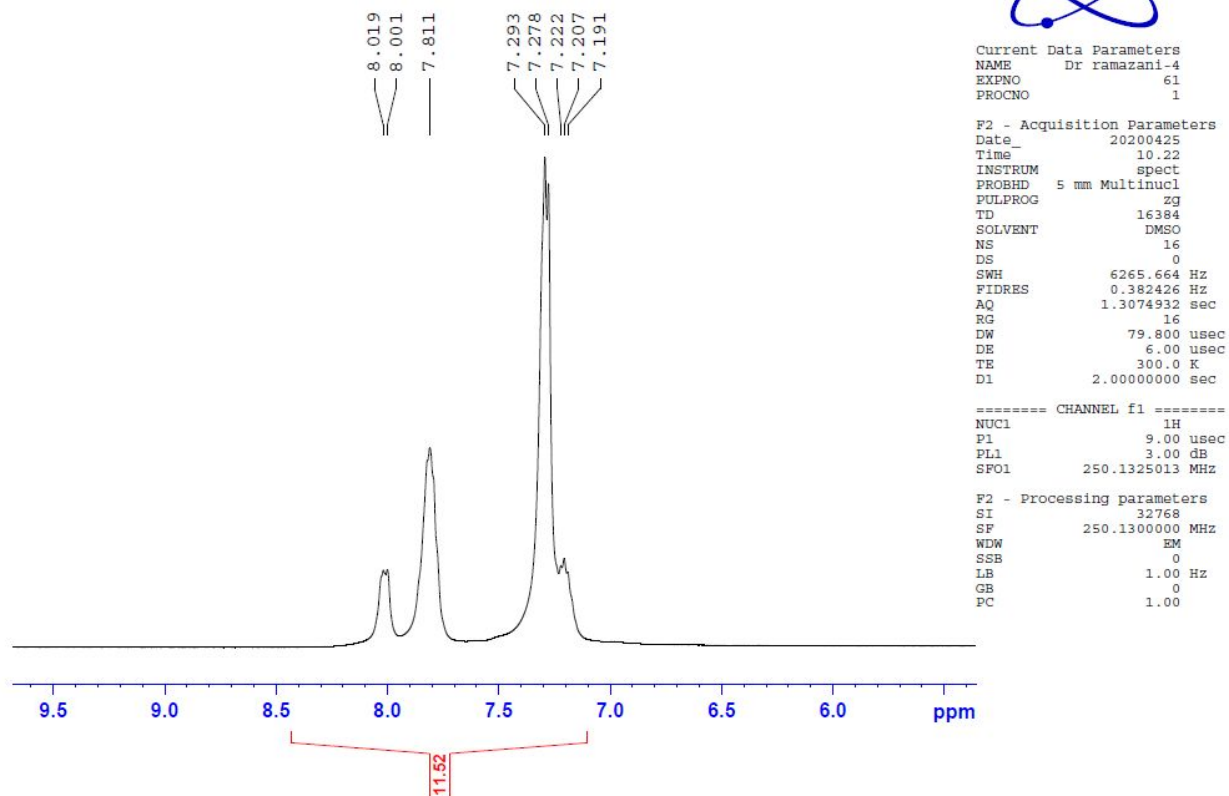

**Figure S3.** The expanded  $^1\text{H}$  NMR spectrum of 2-amino-4-(phenyl)-5,10-dioxo-5,10-dihydro-4H-benzo[g]chromene-3-carbonitrile



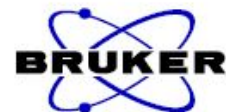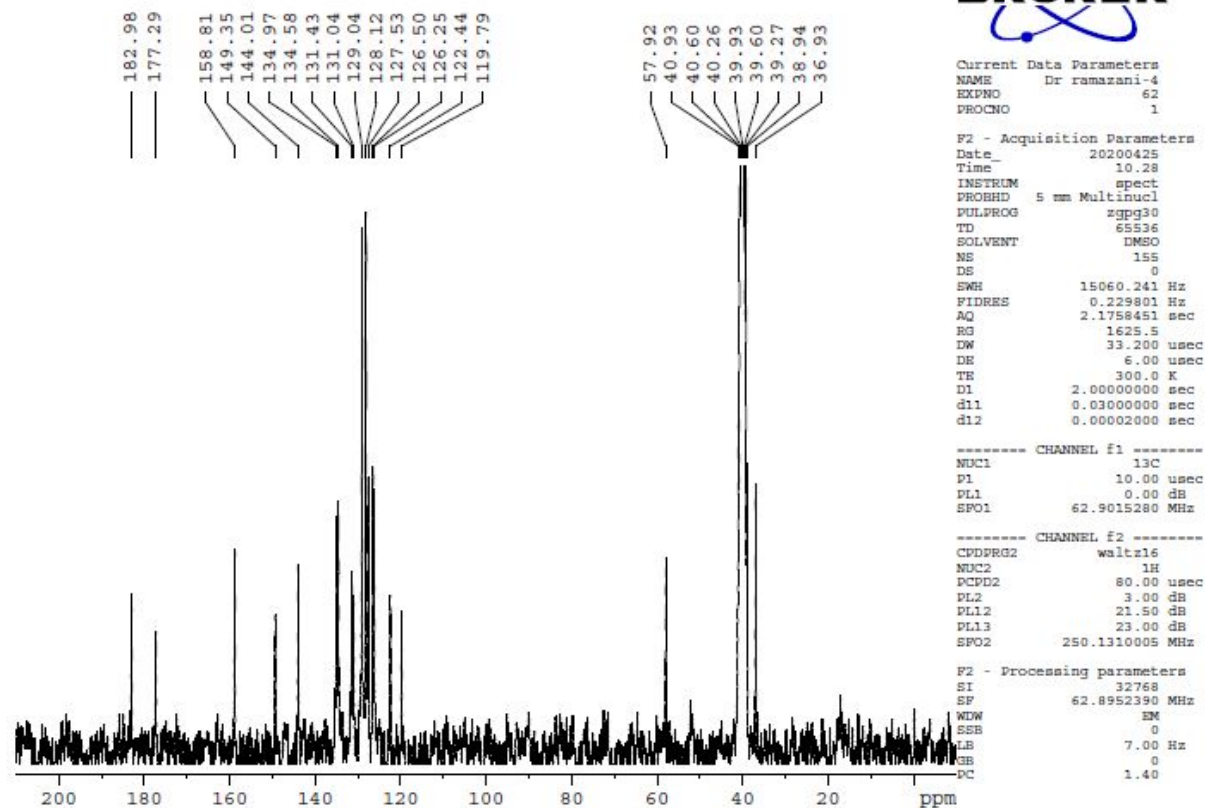

**Figure S4.**  $^{13}\text{C}$  NMR spectrum of 2-amino-4-(phenyl)-5,10-dioxo-5,10-dihydro-4H-benzo[g]chromene-3-carbonitrile

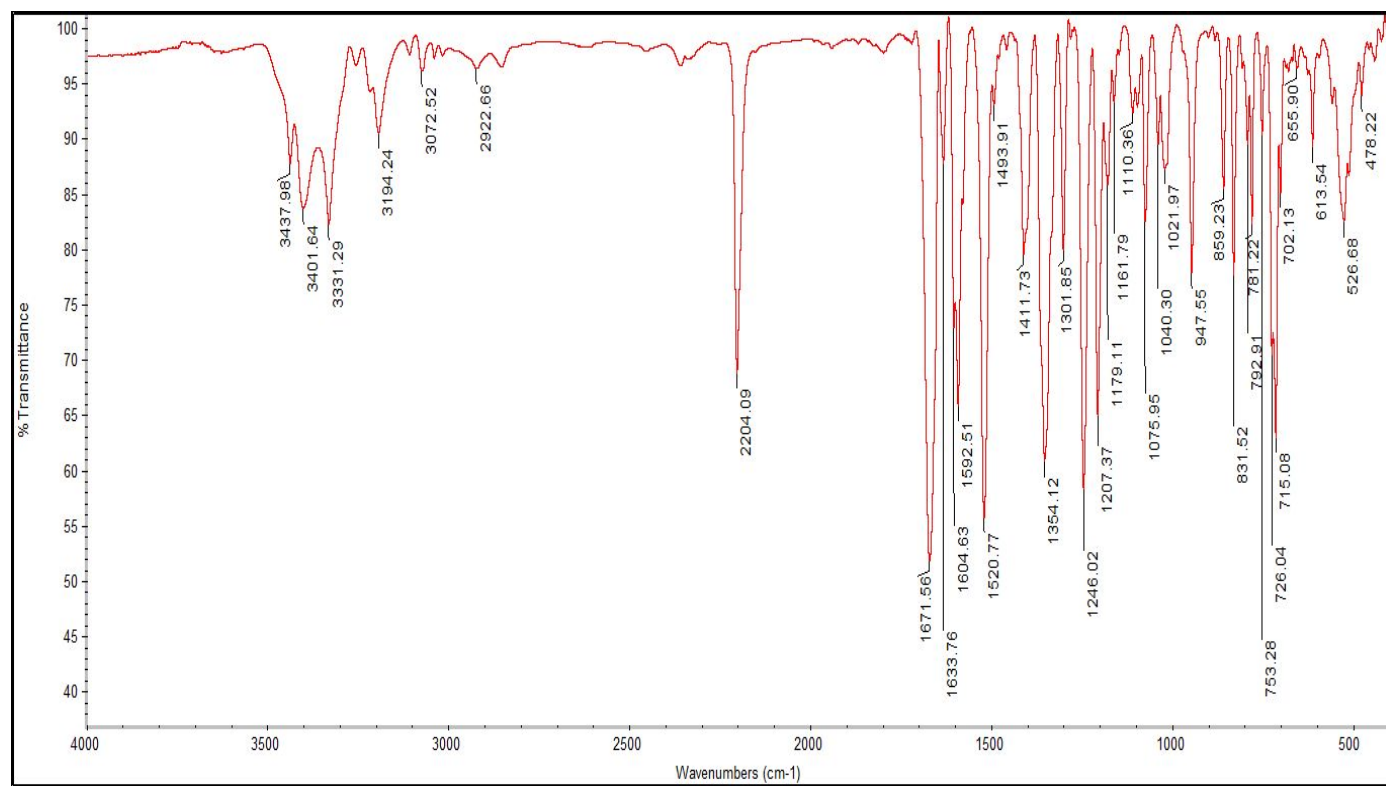

**Figure S5.** FT-IR spectrum of 2-amino-4-(4-nitrophenyl)-5,10-dioxo-5,10-dihydro-4H-benzo[g]chromene-3-carbonitrile

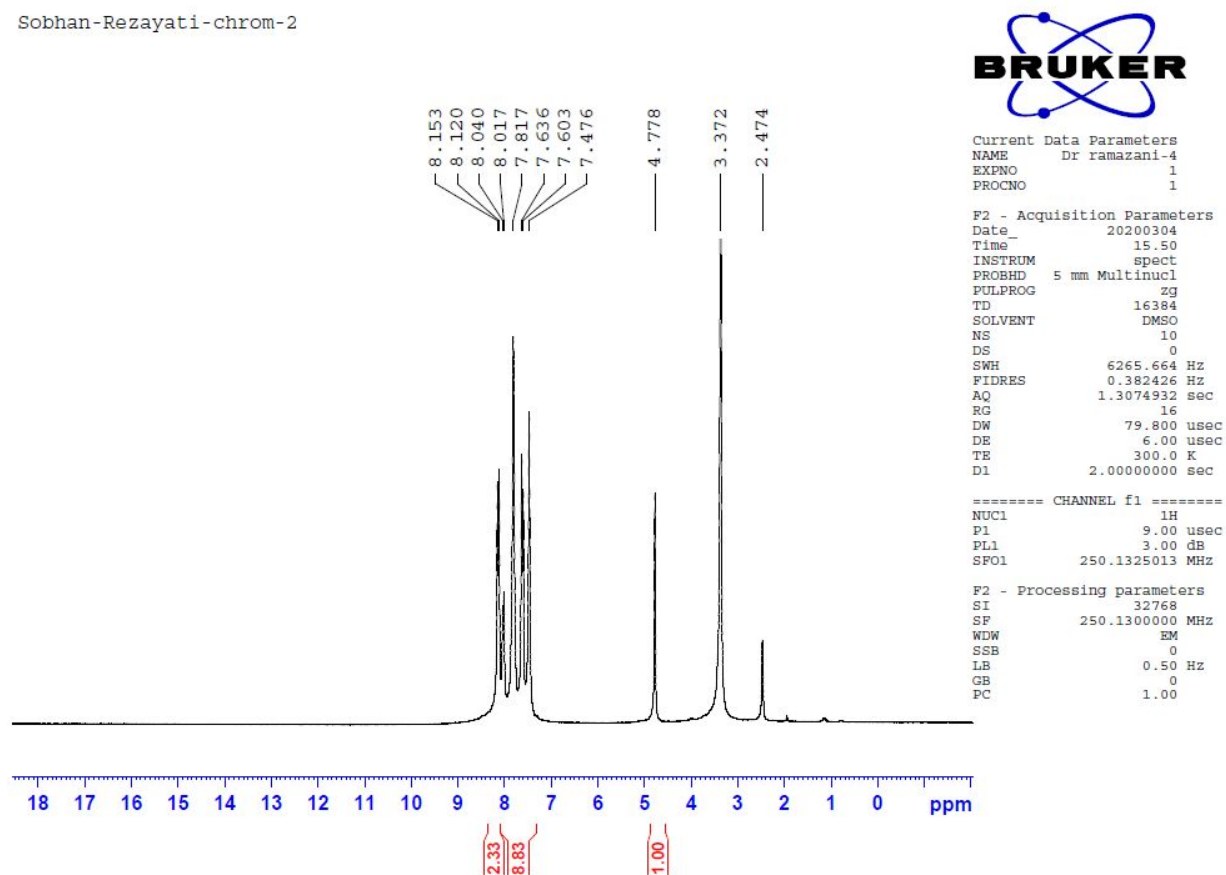

**Figure S6.**  $^1\text{H}$  NMR spectrum of 2-amino-4-(4-nitrophenyl)-5,10-dioxo-5,10-dihydro-4H-benzo[g]chromene-3-carbonitrile

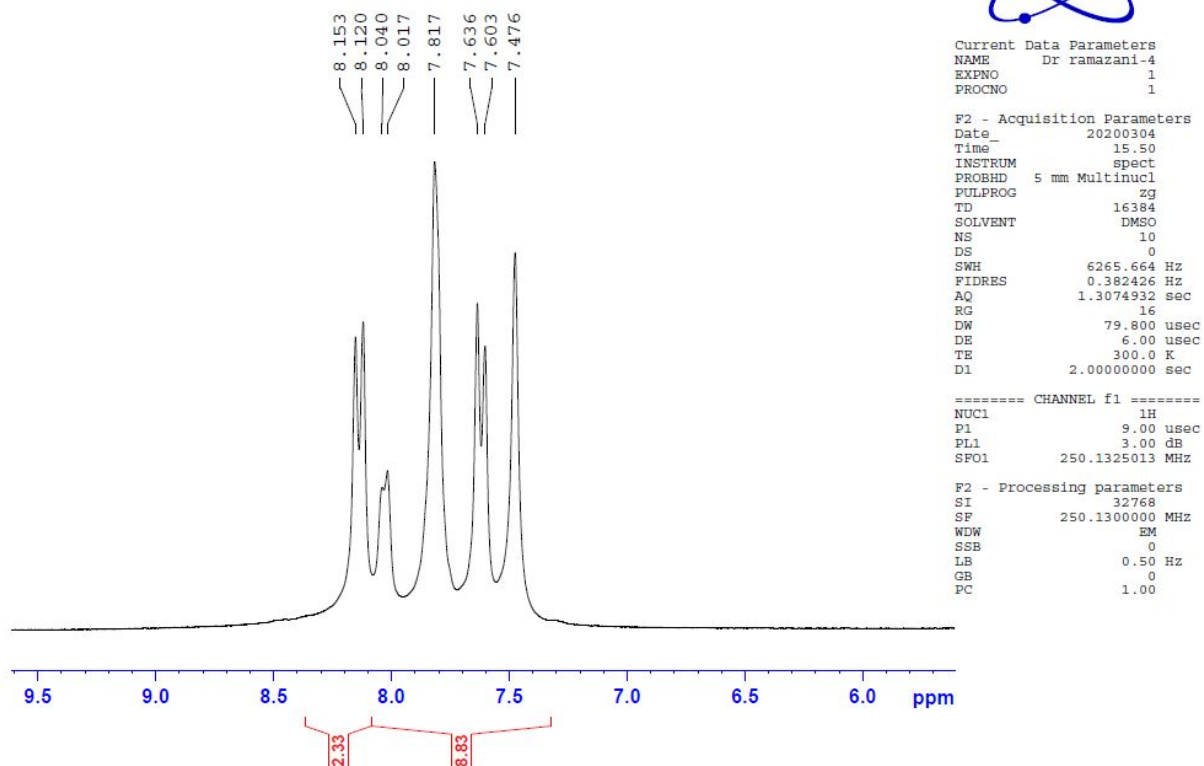

**Figure S7.** The expanded  $^1\text{H}$  NMR spectrum of 2-amino-4-(4-nitrophenyl)-5,10-dioxo-5,10-dihydro-4*H*-benzo[*g*]chromene-3-carbonitrile

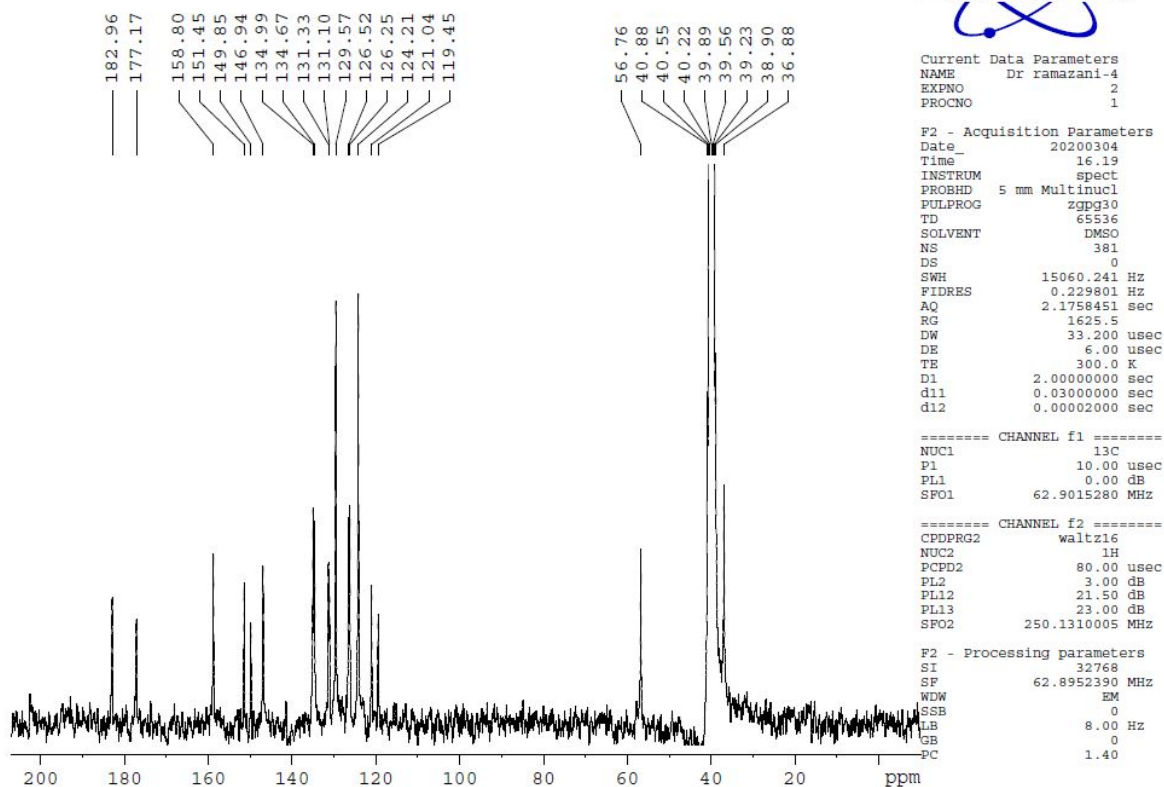

**Figure S8.**  $^{13}\text{C}$  NMR spectrum of 2-amino-4-(4-nitrophenyl)-5,10-dioxo-5,10-dihydro-4H-benzo[g]chromene-3-carbonitrile

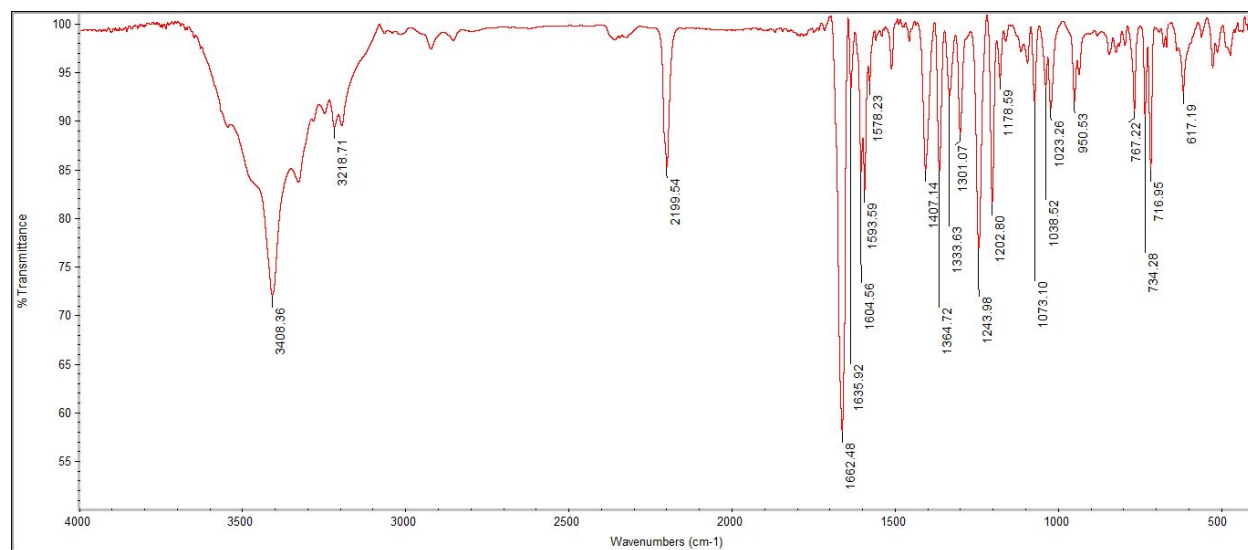

**Figure S9.** FT-IR spectrum of 2-amino-4-(4-methylphenyl)-5,10-dioxo-5,10-dihydro-4H-benzo[g]chromene-3-carbonitrile

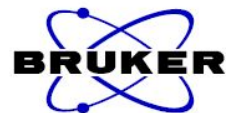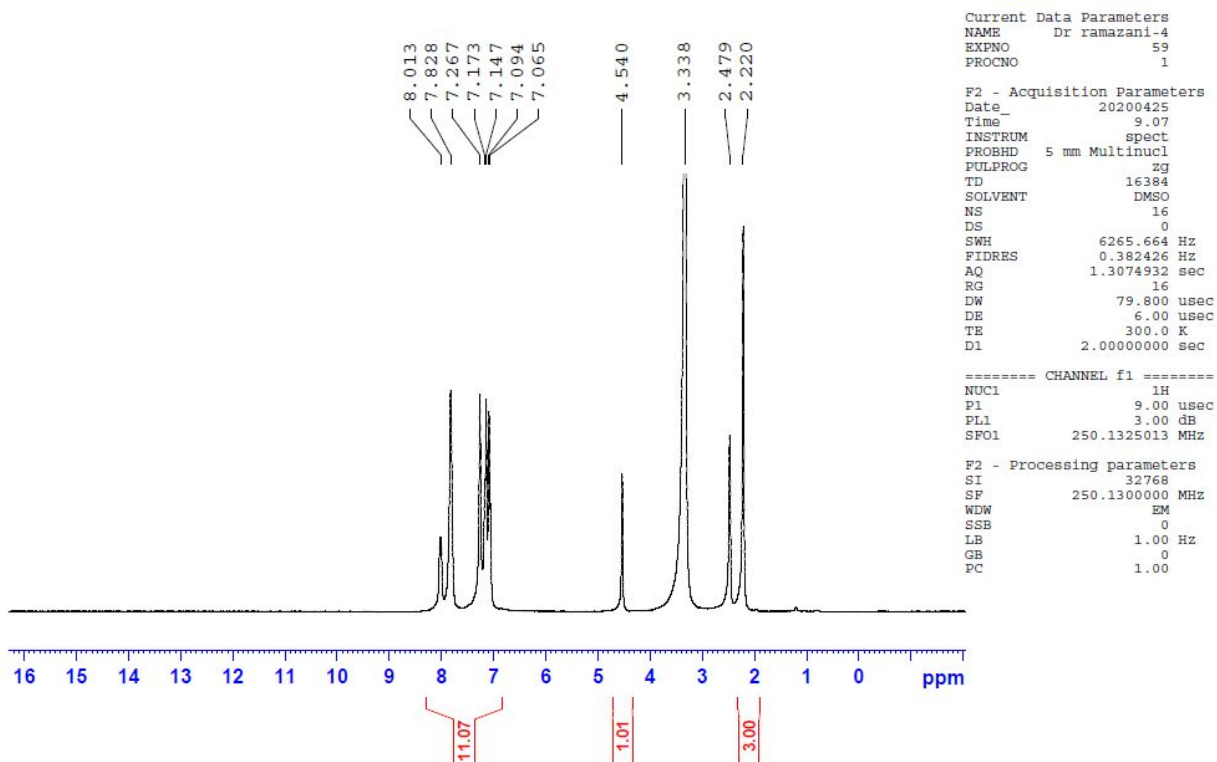

**Figure S10.**  $^1\text{H}$  NMR spectrum of 2-amino-4-(4-methylphenyl)-5,10-dioxo-5,10-dihydro-4H-benzo[g]chromene-3-carbonitrile

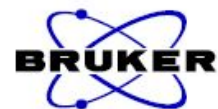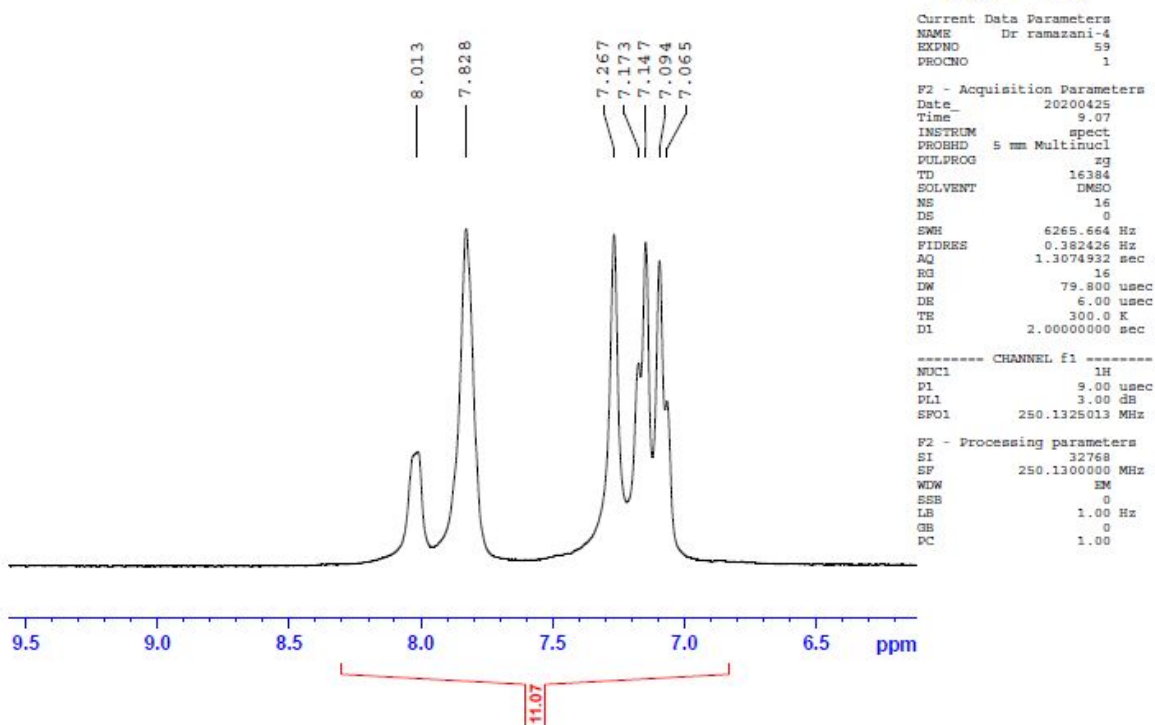

**Figure S11.** The expanded  $^1\text{H}$  NMR spectrum of 2-amino-4-(4-methylphenyl)-5,10-dioxo-5,10-dihydro-4*H*-benzo[*g*]chromene-3-carbonitrile



Sobhan-rezayati-Chrome-3-1400-2-4

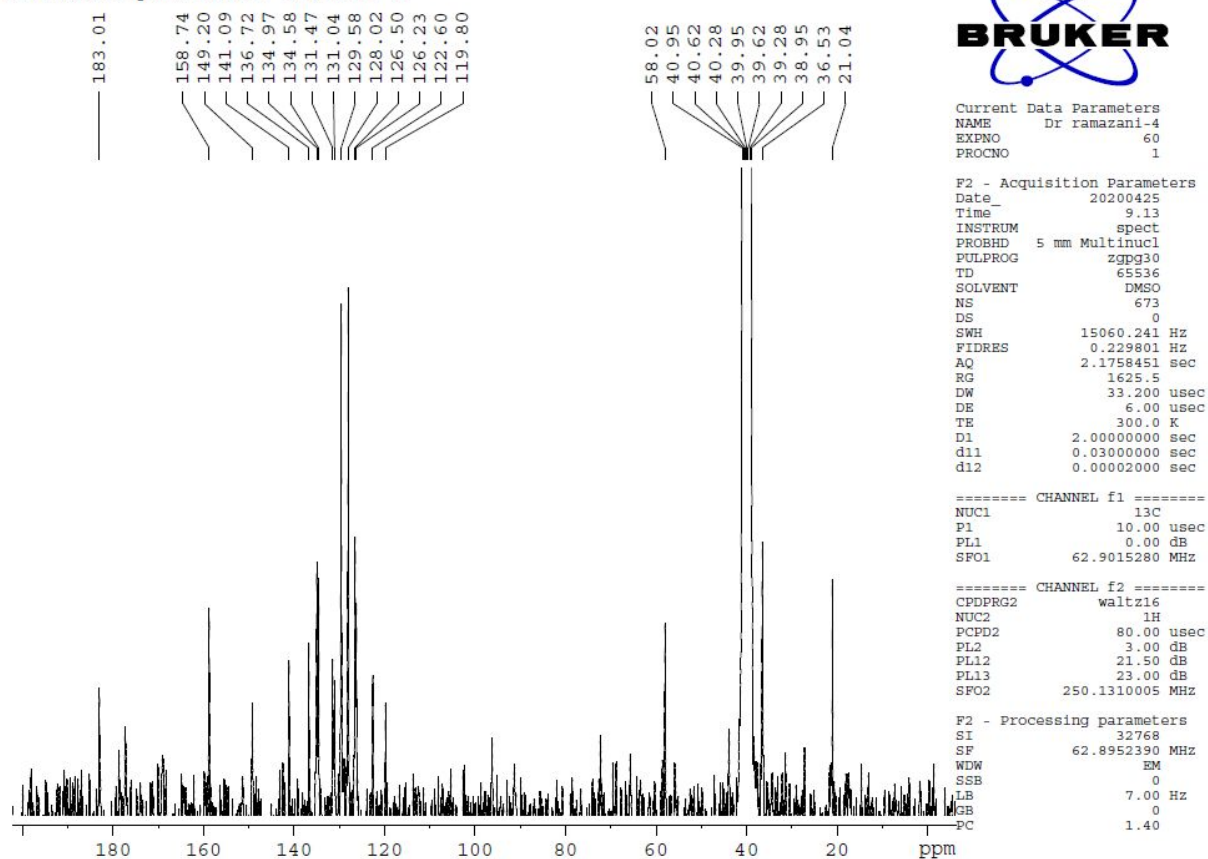

**Figure S12.**  $^{13}\text{C}$  NMR spectrum of 2-amino-4-(4-methylphenyl)-5,10-dioxo-5,10-dihydro-4H-benzo[g]chromene-3-carbonitrile

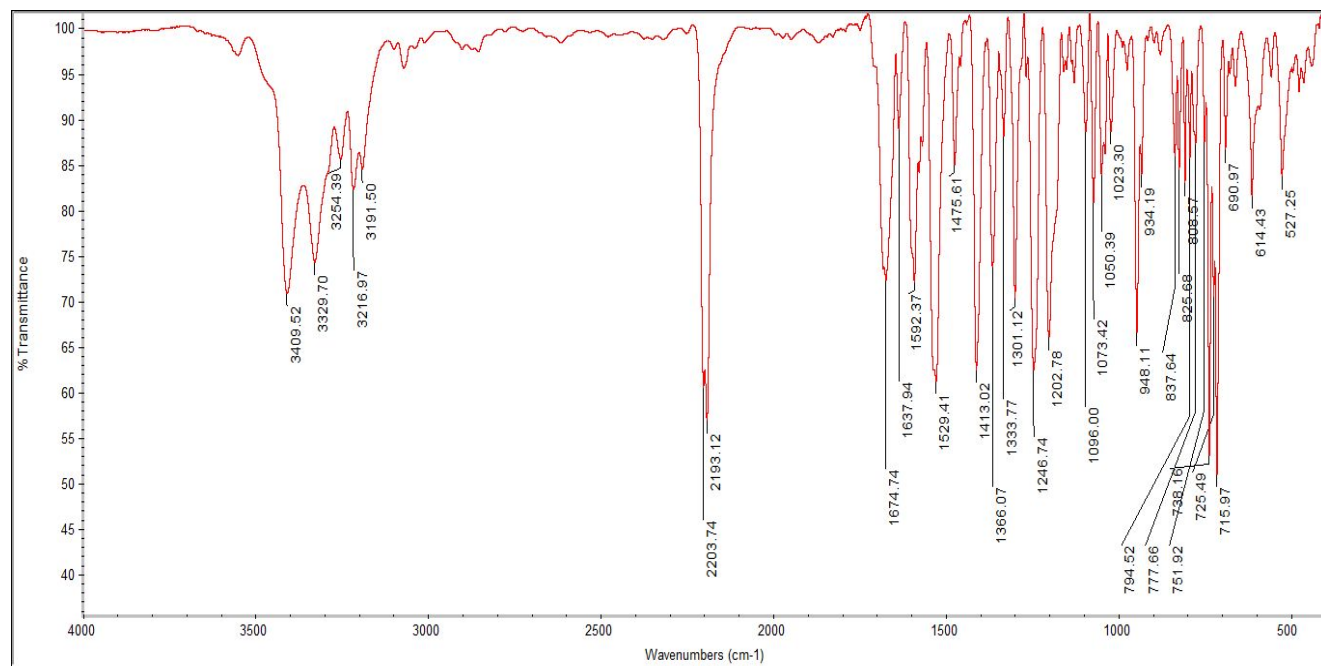

**Figure S13.** FT-IR spectrum of 2-amino-4-(4-chloro-3-nitrophenyl)-5,10-dioxo-5,10-dihydro-4H-benzo[g]chromene-3-carbonitrile

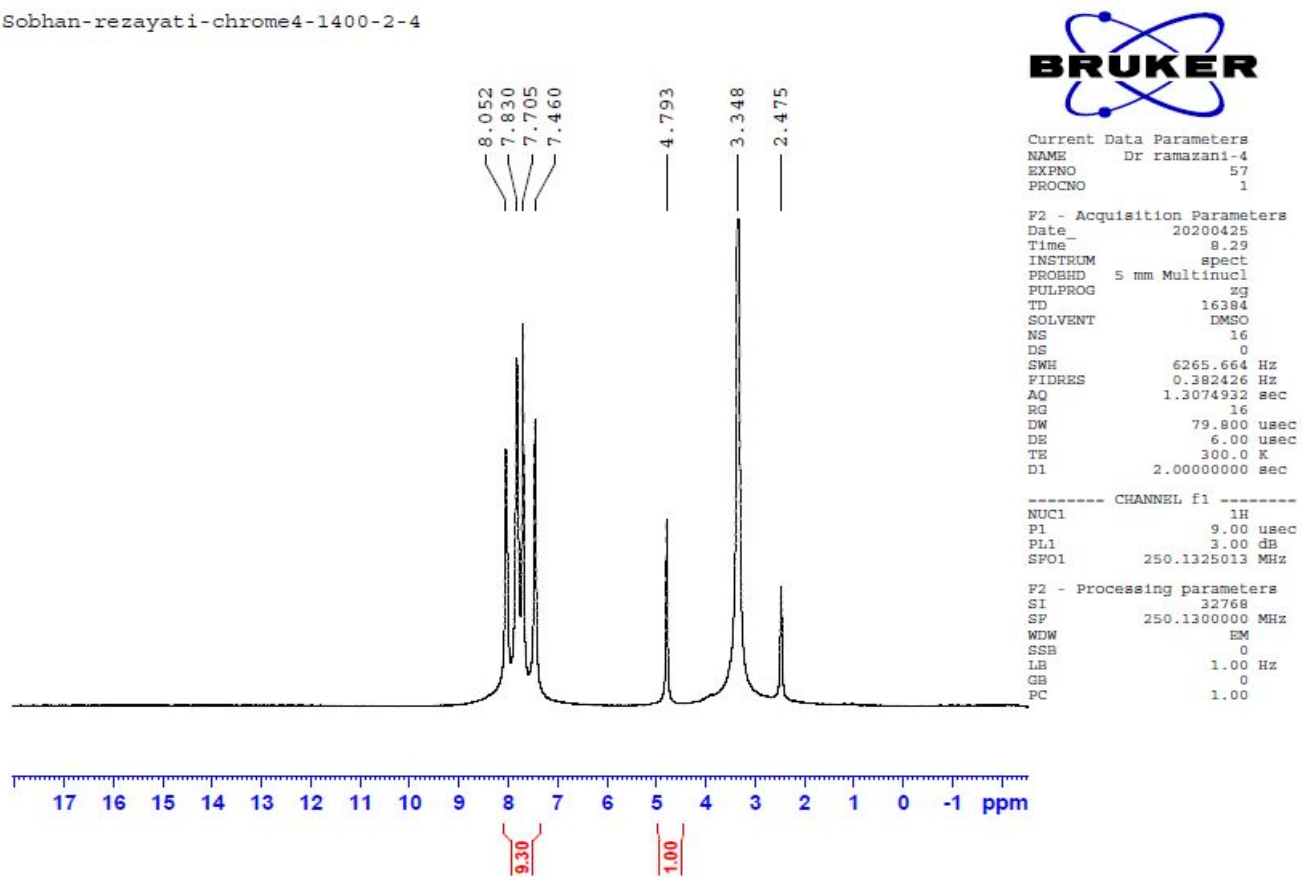

**Figure S14.**  $^1\text{H}$  NMR spectrum of 2-amino-4-(4-chloro-3-nitrophenyl)-5,10-dioxo-5,10-dihydro-4H-benzo[g]chromene-3-carbonitrile

Sobhan-rezayati-chrome4-1400-2-4

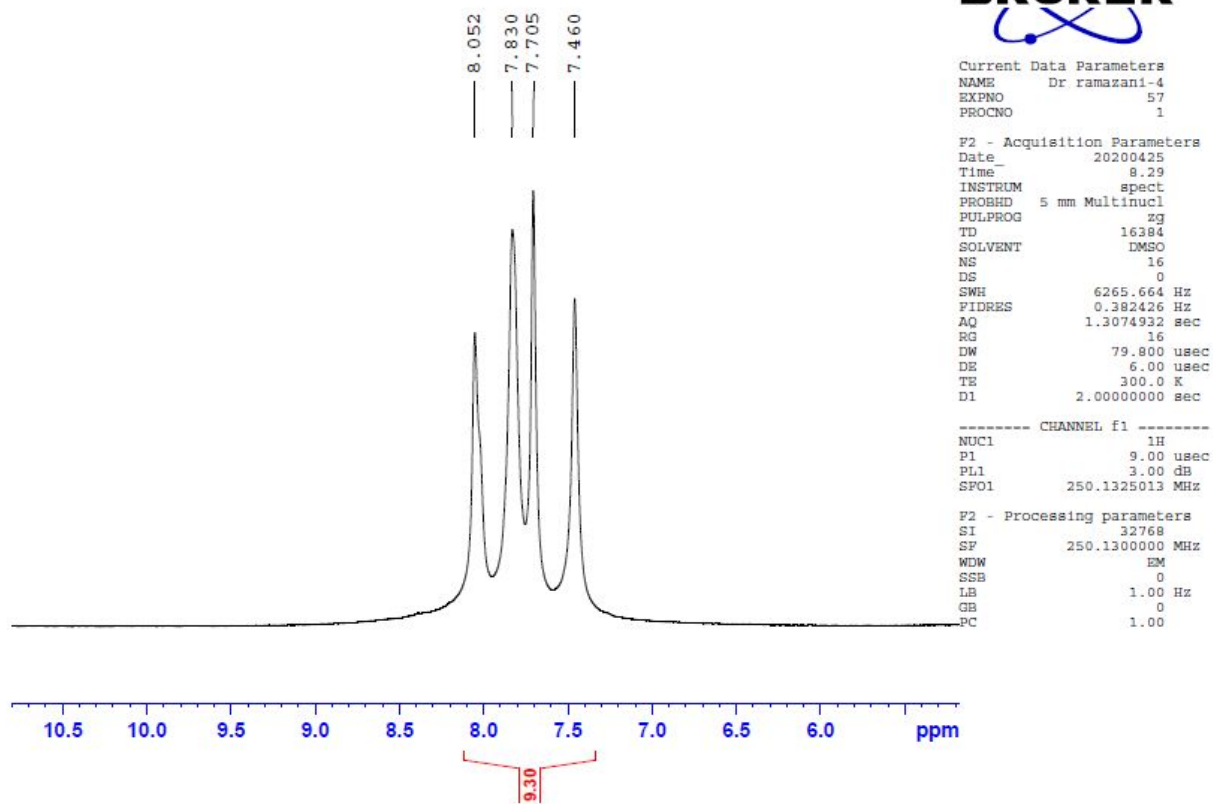

**Figure S15.** The expanded  $^1\text{H}$  NMR spectrum of 2-amino-4-(4-chloro-3-nitrophenyl)-5,10-dioxo-5,10-dihydro-4*H*-benzo[*g*]chromene-3-carbonitrile

Sobhan-rezayati-chrome-4-1400-2-4

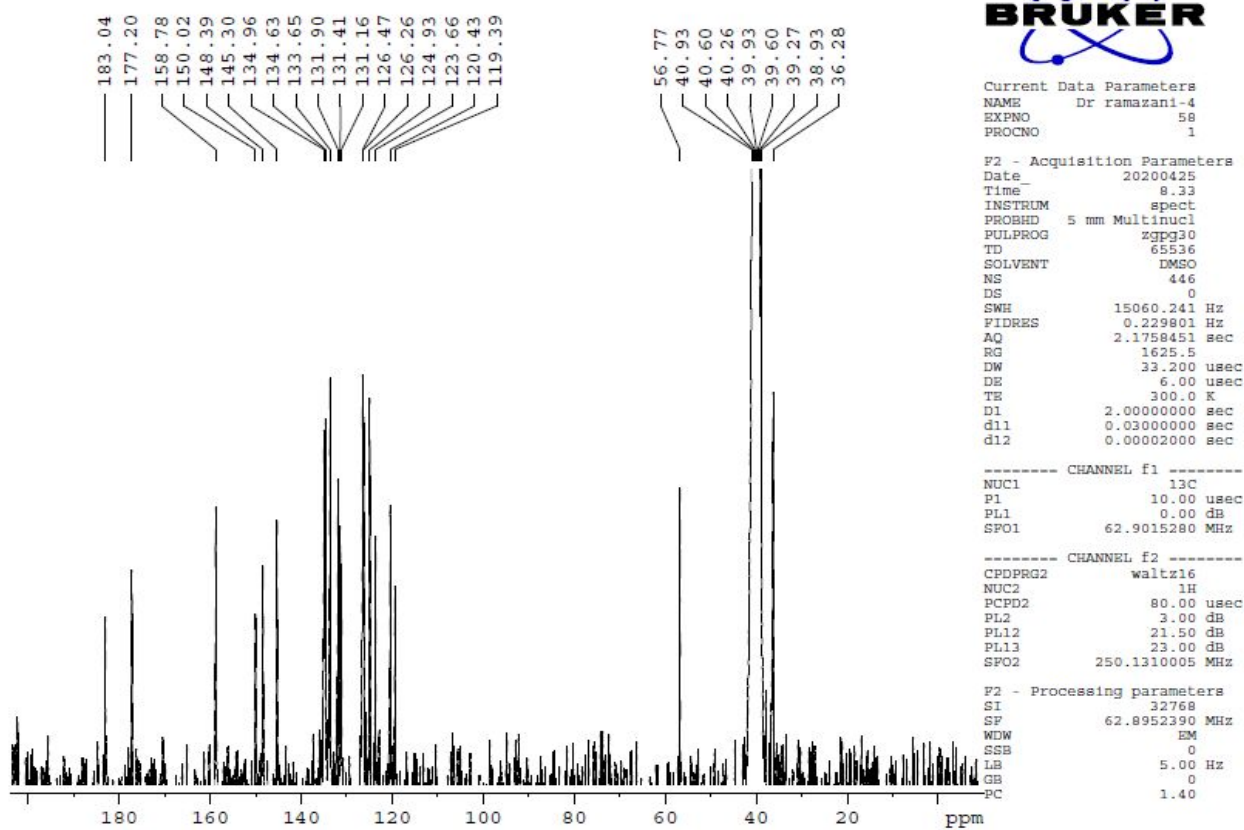

**Figure S16.**  $^{13}\text{C}$  NMR spectrum of 2-amino-4-(4-chloro-3-nitrophenyl)-5,10-dioxo-5,10-dihydro-4H-benzo[g]chromene-3-carbonitrile

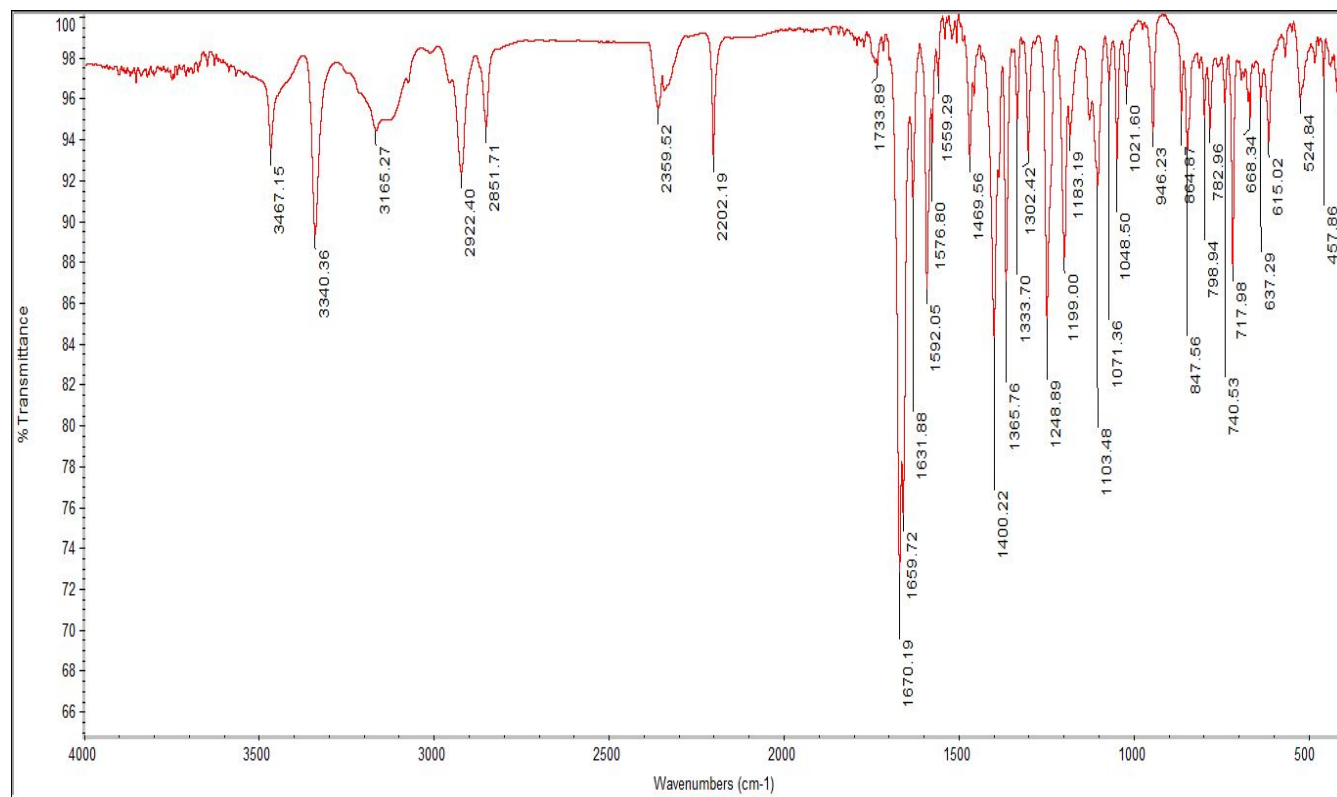

**Figure S17.** FT-IR spectrum of 2-amino-4-(2,4-dichlorophenyl)-5,10-dioxo-5,10-dihydro-4*H*-benzo[*g*]chromene-3 carbonitrile

Sobhan-Rezayati-chrom-5-99-12-16

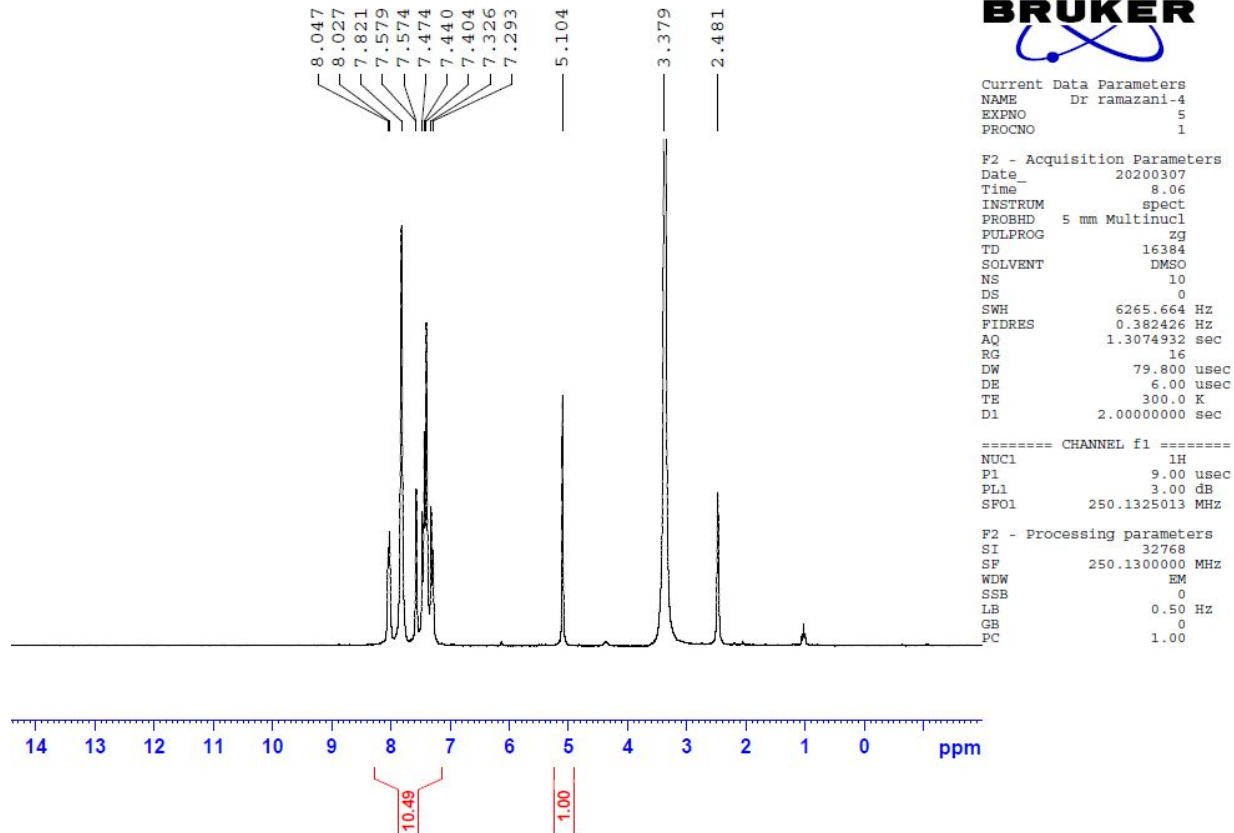

**Figure S18.**  $^1\text{H}$  NMR spectrum of 2-amino-4-(2,4-dichlorophenyl)-5,10-dioxo-5,10-dihydro-4H-benzo[g]chromene-3 carbonitrile

Sobhan-Rezayati-chrom-5-99-12-16

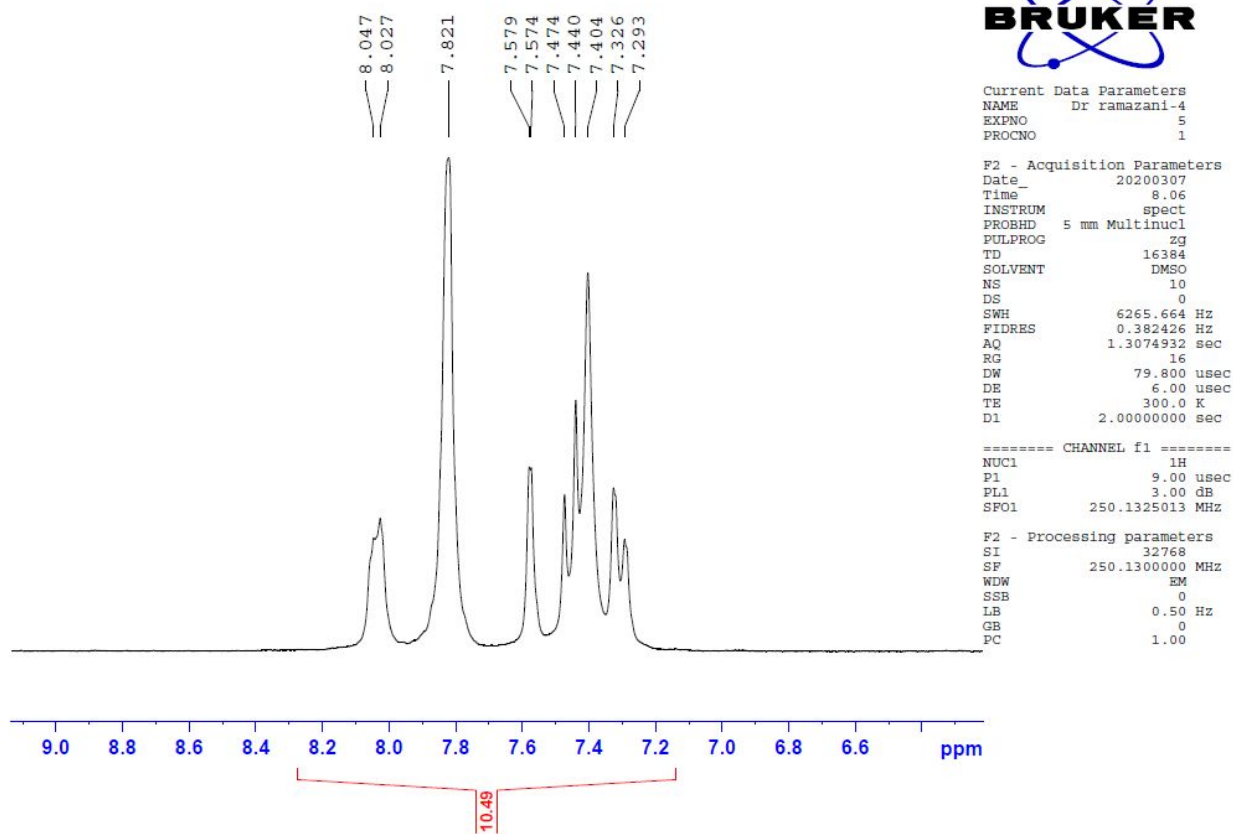

**Figure S19.** The expanded  $^1\text{H}$  NMR spectrum of 2-amino-4-(2,4-dichlorophenyl)-5,10-dioxo-5,10-dihydro-4*H*-benzo[*g*]chromene-3 carbonitrile



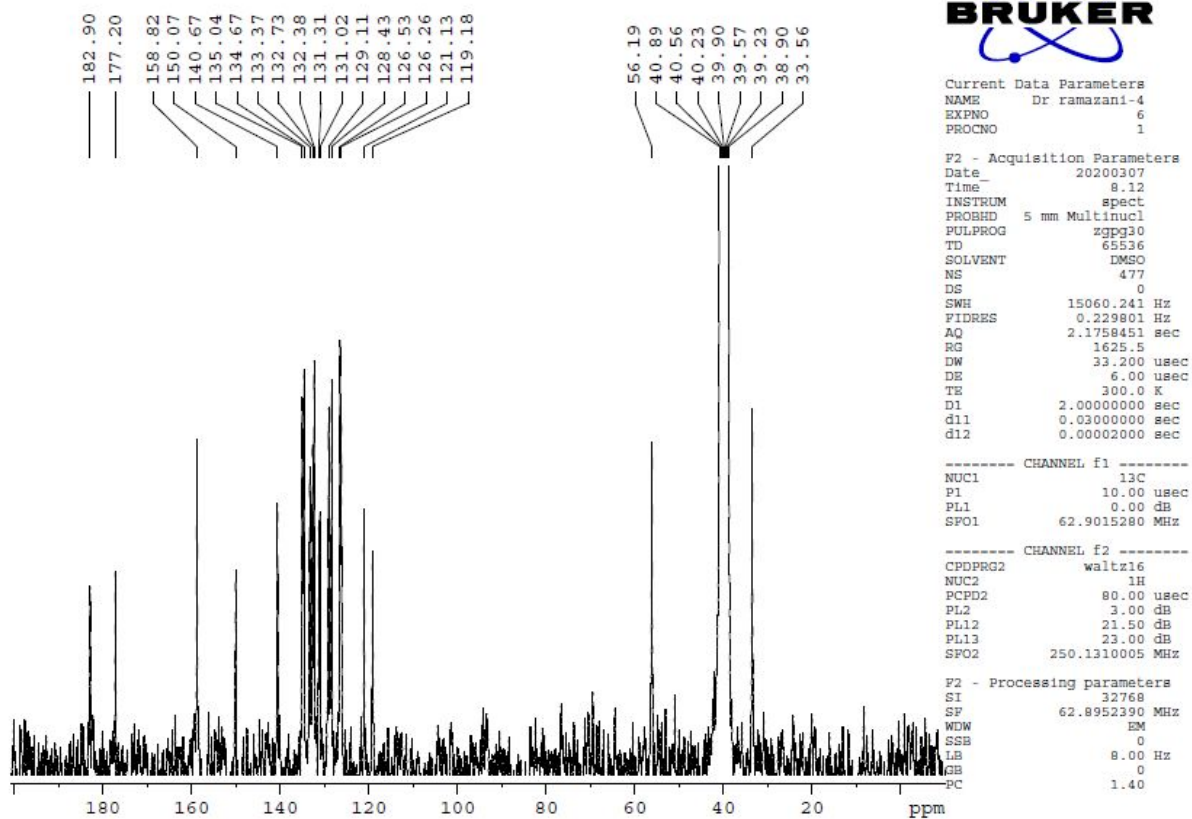

**Figure S20.**  $^{13}\text{C}$  NMR spectrum of 2-amino-4-(2,4-dichlorophenyl)-5,10-dioxo-5,10-dihydro-4H-benzo[g]chromene-3 carbonitrile

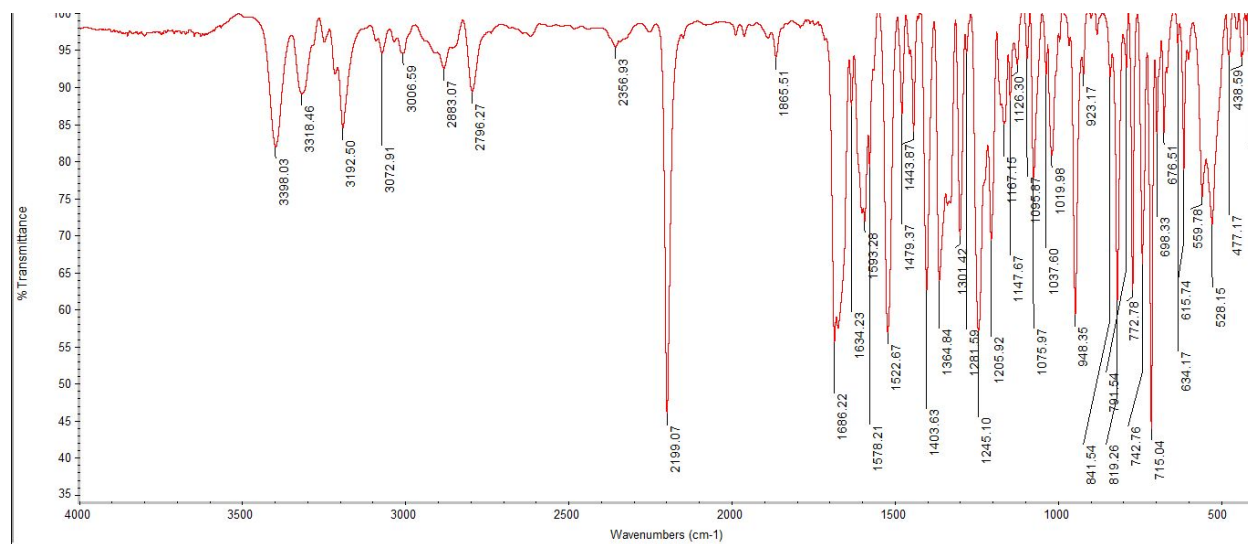

**Figure S21.** FT-IR spectrum of 2-amino-4-(4-(dimethylamino) phenyl)-5,10-dioxo-5,10-dihydro-4H/benzo[g]chromene-3-carbonitrile

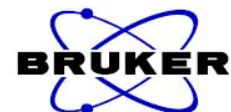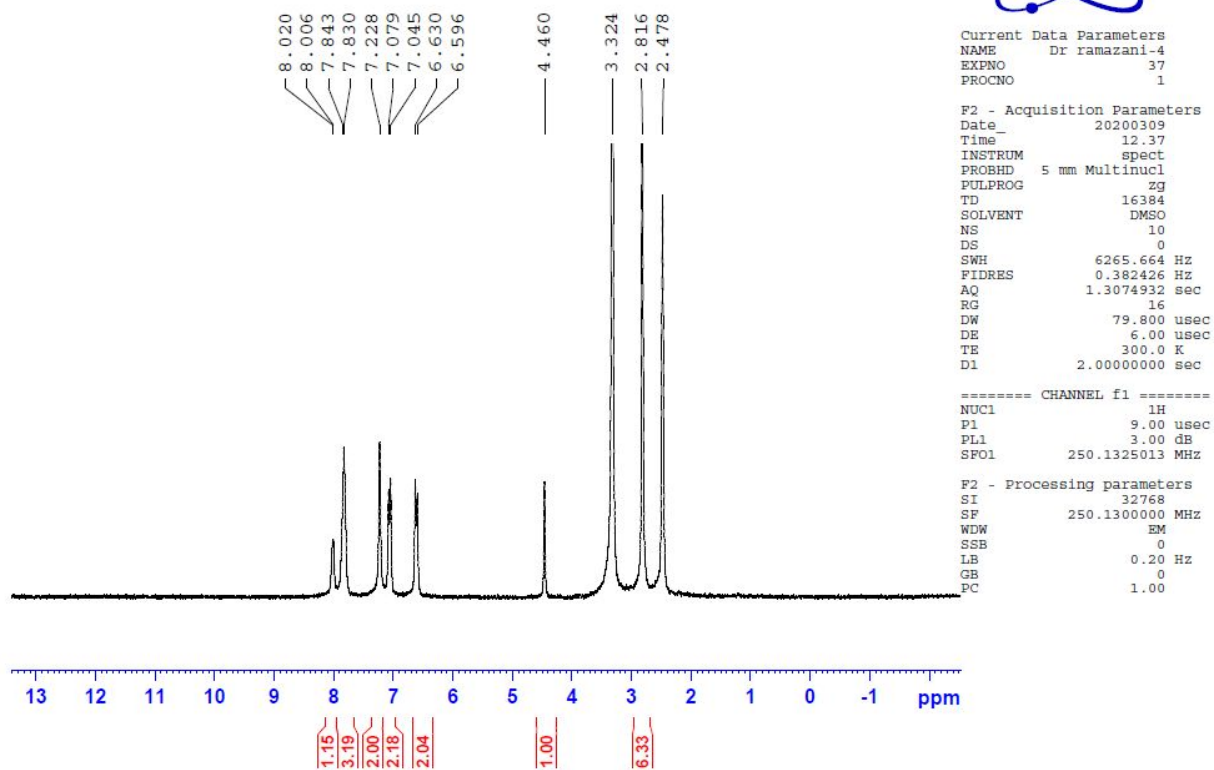

**Figure S22.**  $^1\text{H}$  NMR spectrum of 2-amino-4-(4-(dimethylamino) phenyl)-5,10-dioxo-5,10-dihydro-4*H*benzo[*g*]chromene-3-carbonitrile

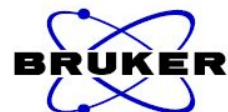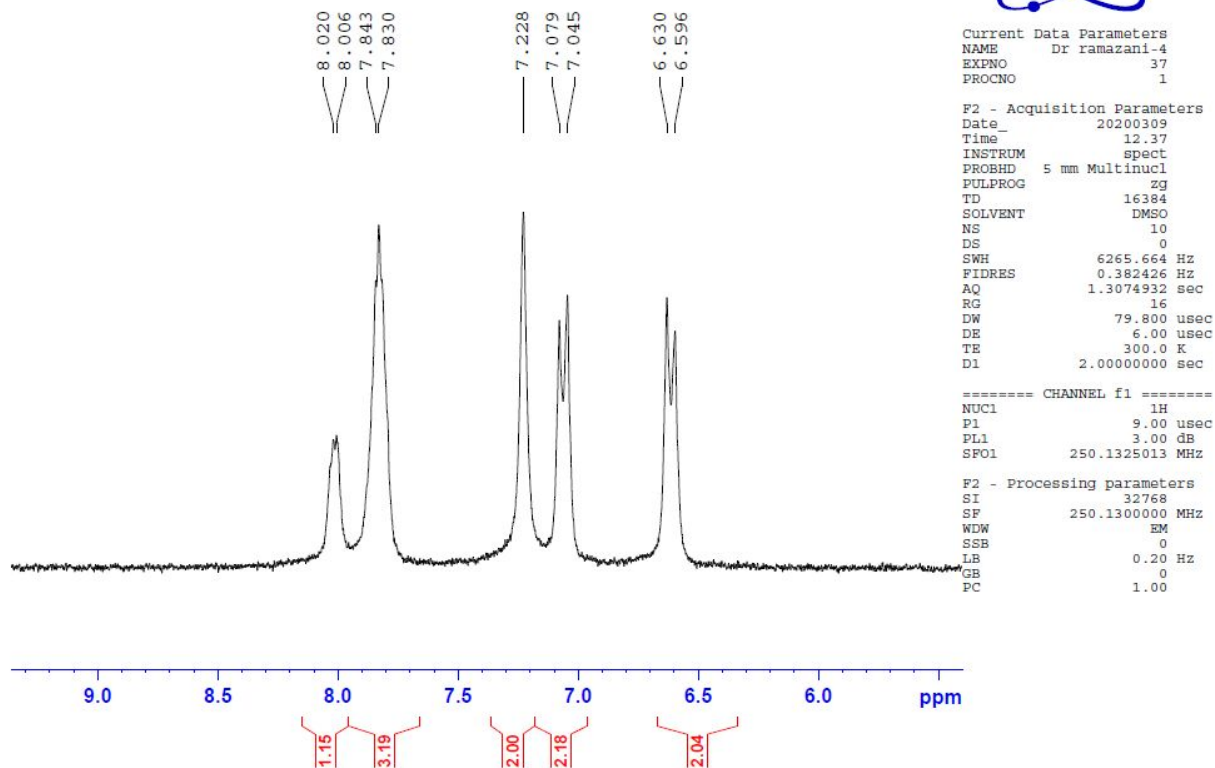

**Figure S23.** The expanded <sup>1</sup>H NMR of 2-amino-4-(4-(dimethylamino) phenyl)-5,10-dioxo-5,10-dihydro-4*H*benzo[*g*]chromene-3-carbonitrile

Rezayati-Chrome-7-1400-2-6

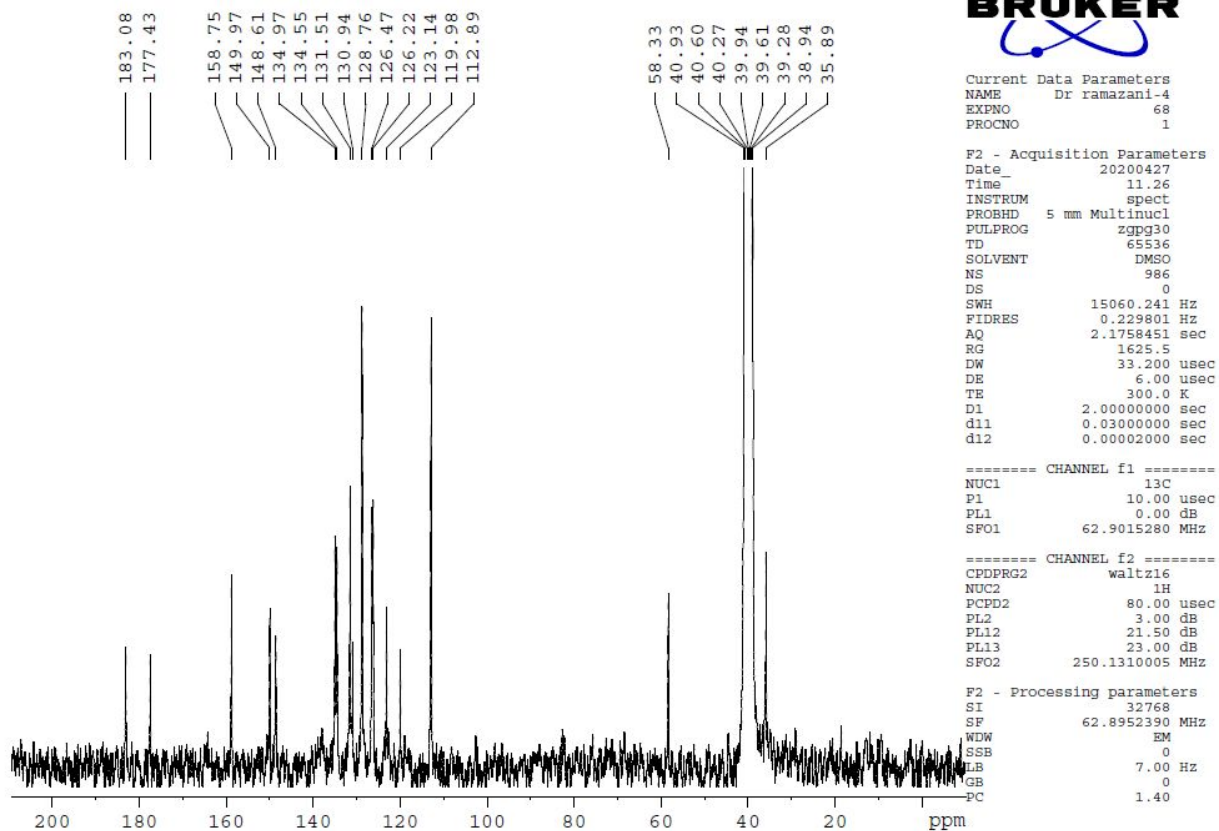

**Figure S24.**  $^{13}\text{C}$  NMR spectrum of 2-amino-4-(4-(dimethylamino) phenyl)-5,10-dioxo-5,10-dihydro-4*H*benzo[*g*]chromene-3-carbonitrile

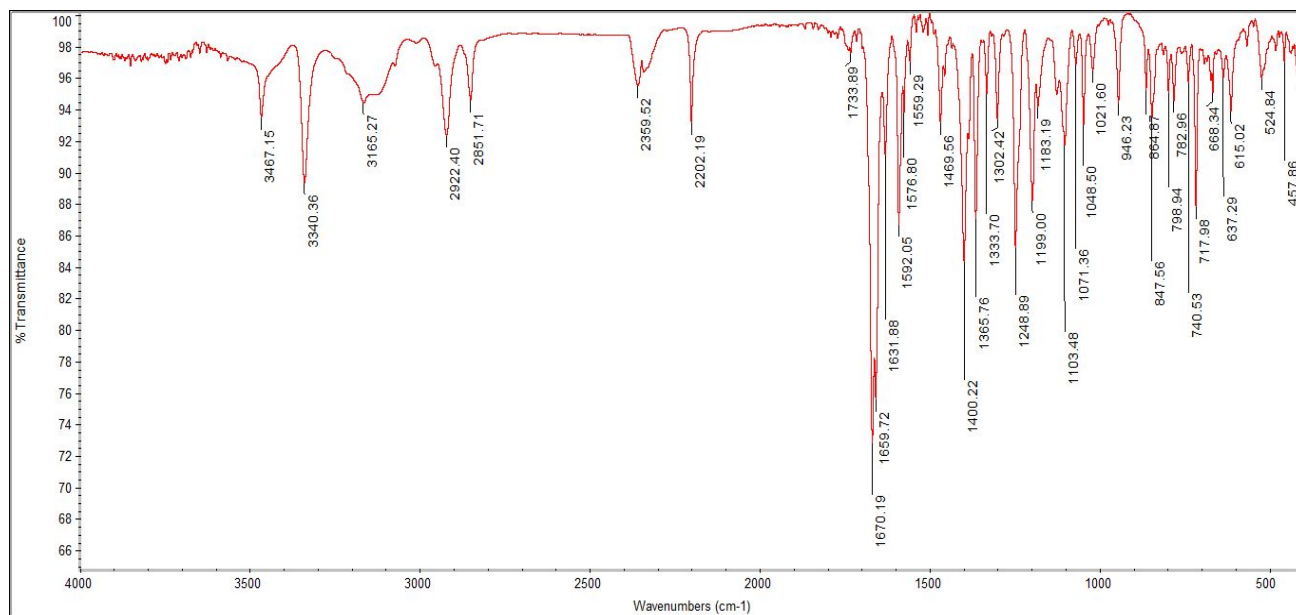

**Figure S25.** FT-IR spectrum of 2-amino-4-(furan-2-yl)-5,10-dioxo-5,10-dihydro-4H-benzo[g]chromene-3-carbonitrile

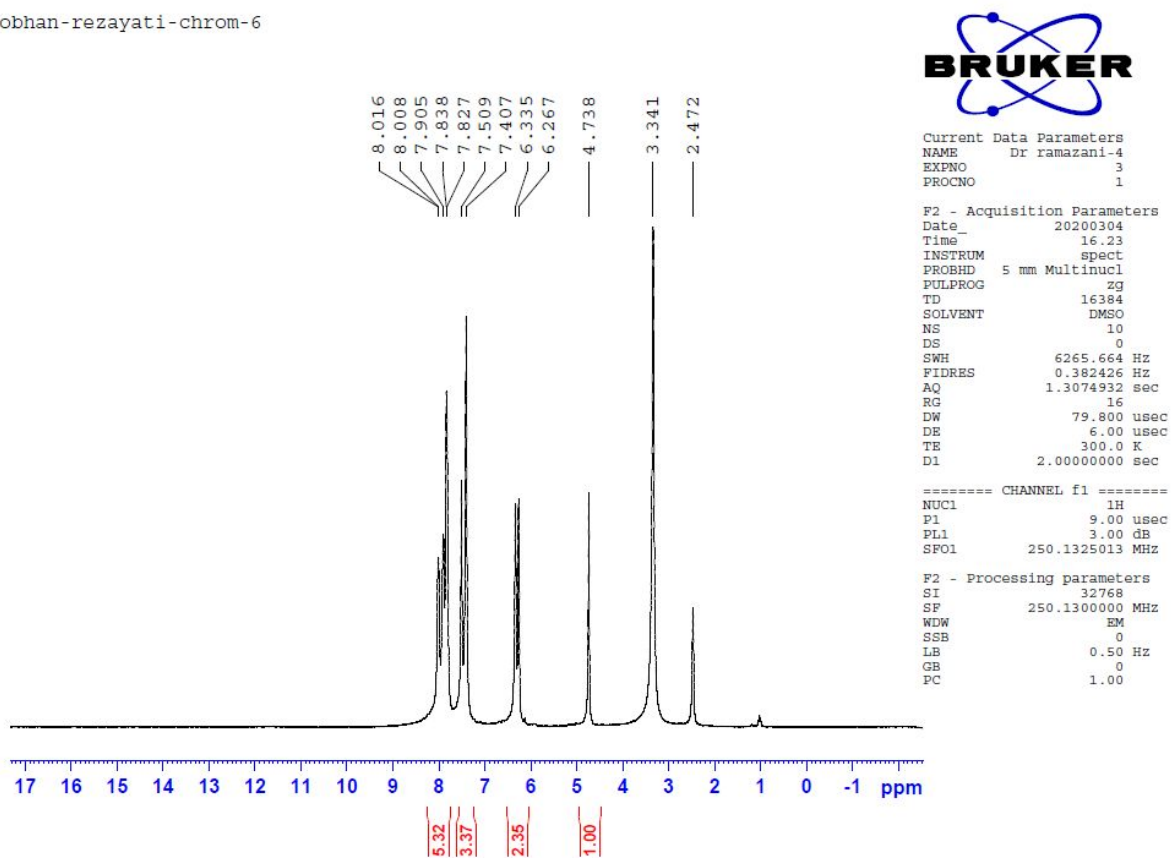

**Figure S26.**  $^1\text{H}$  NMR spectrum of 2-amino-4-(furan-2-yl)-5,10-dioxo-5,10-dihydro-4H-benzo[g]chromene-3-carbonitrile

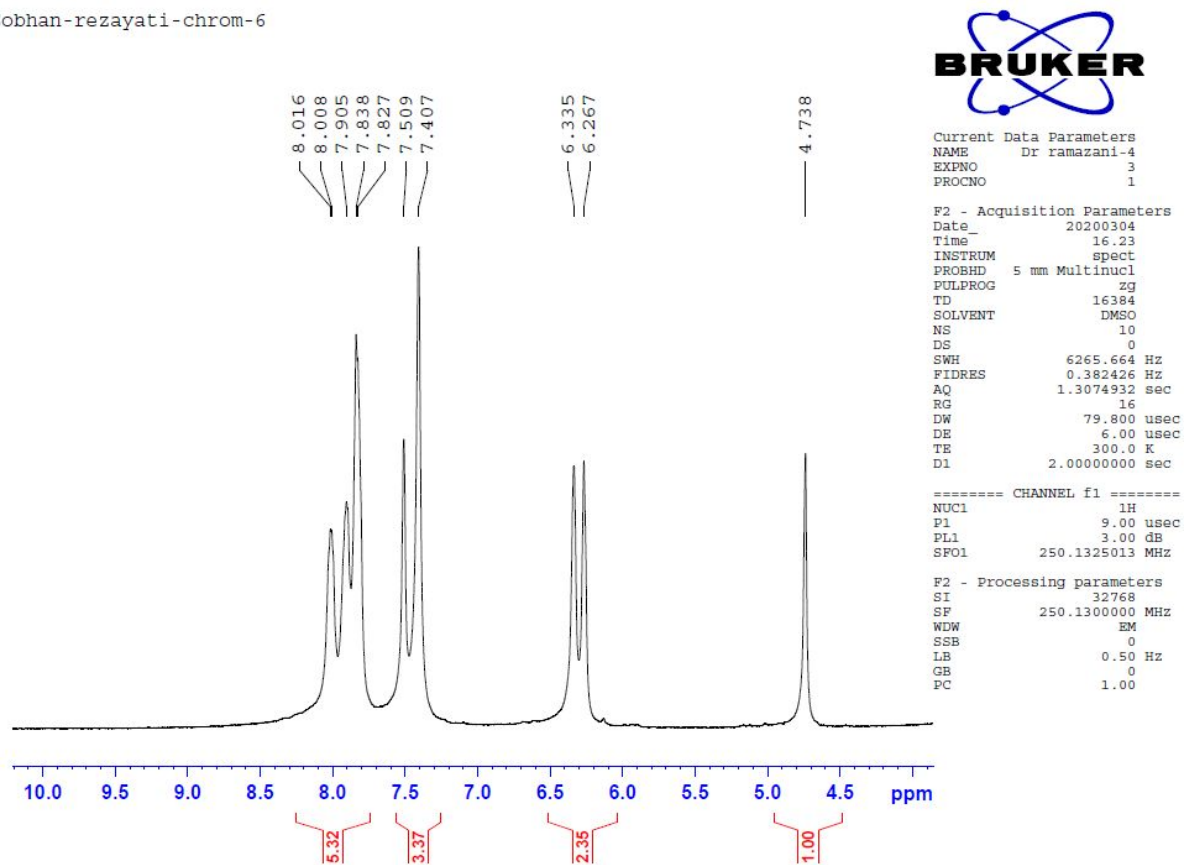

**Figure S27.** The expanded  $^1\text{H}$  NMR spectrum of 2-amino-4-(furan-2-yl)-5,10-dioxo-5,10-dihydro-4*H*-benzo[*g*]chromene-3-carbonitrile



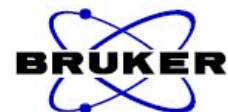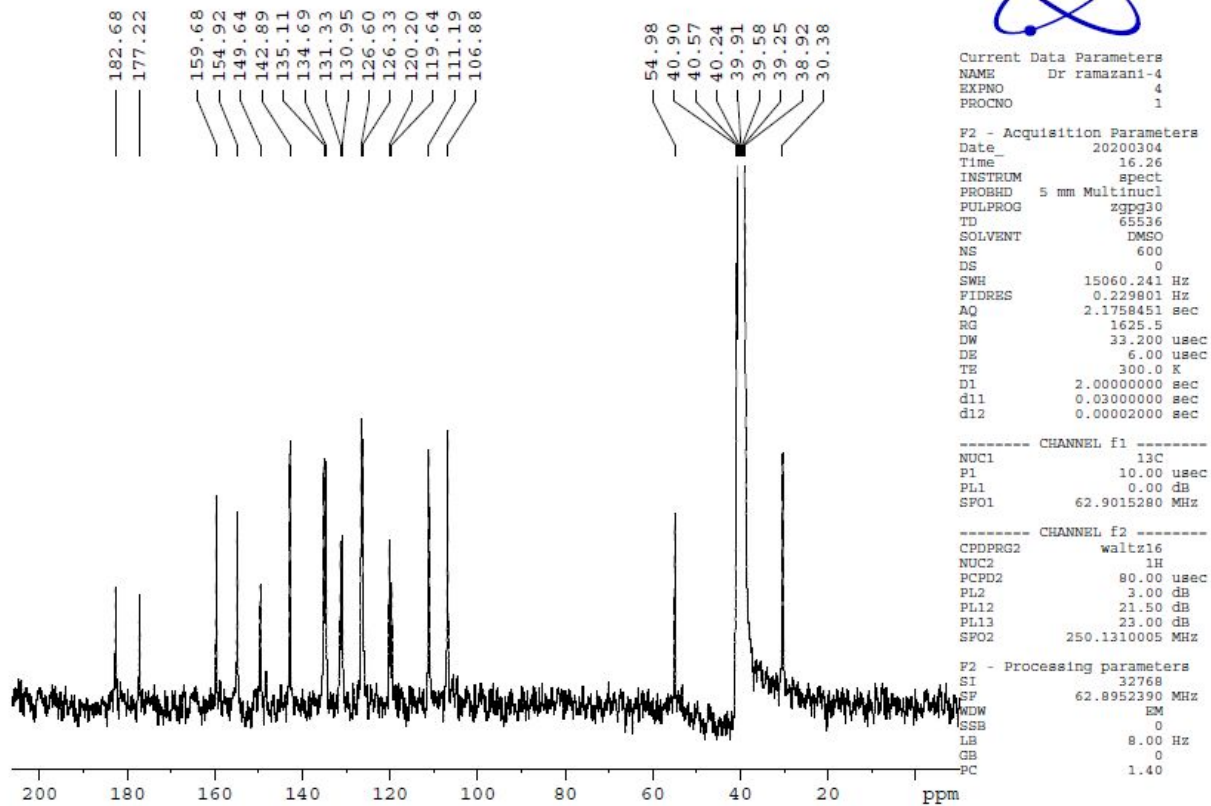

**Figure S28.**  $^{13}\text{C}$  NMR spectrum of 2-amino-4-(furan-2-yl)-5,10-dioxo-5,10-dihydro-4H-benzo[g]chromene-3-carbonitrile

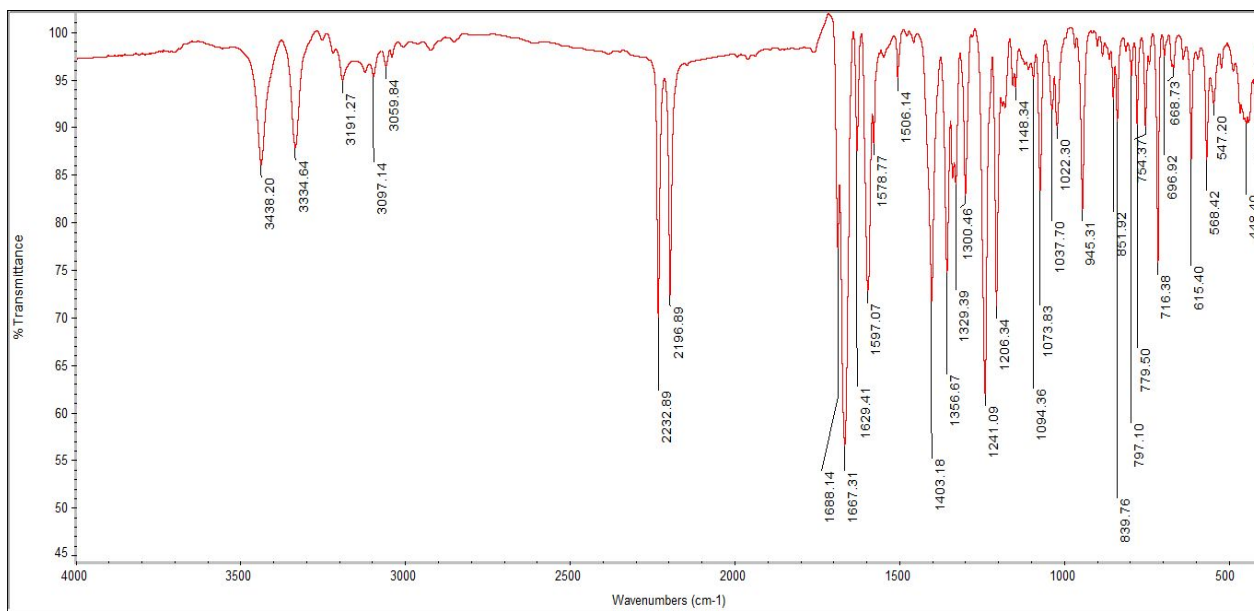

**Figure S29.** FT-IR spectrum of 2-amino-4-(4-cyanophenyl)-5,10-dioxo-5,10-dihydro-4H-benzo[g]chromene-3-carbonitrile

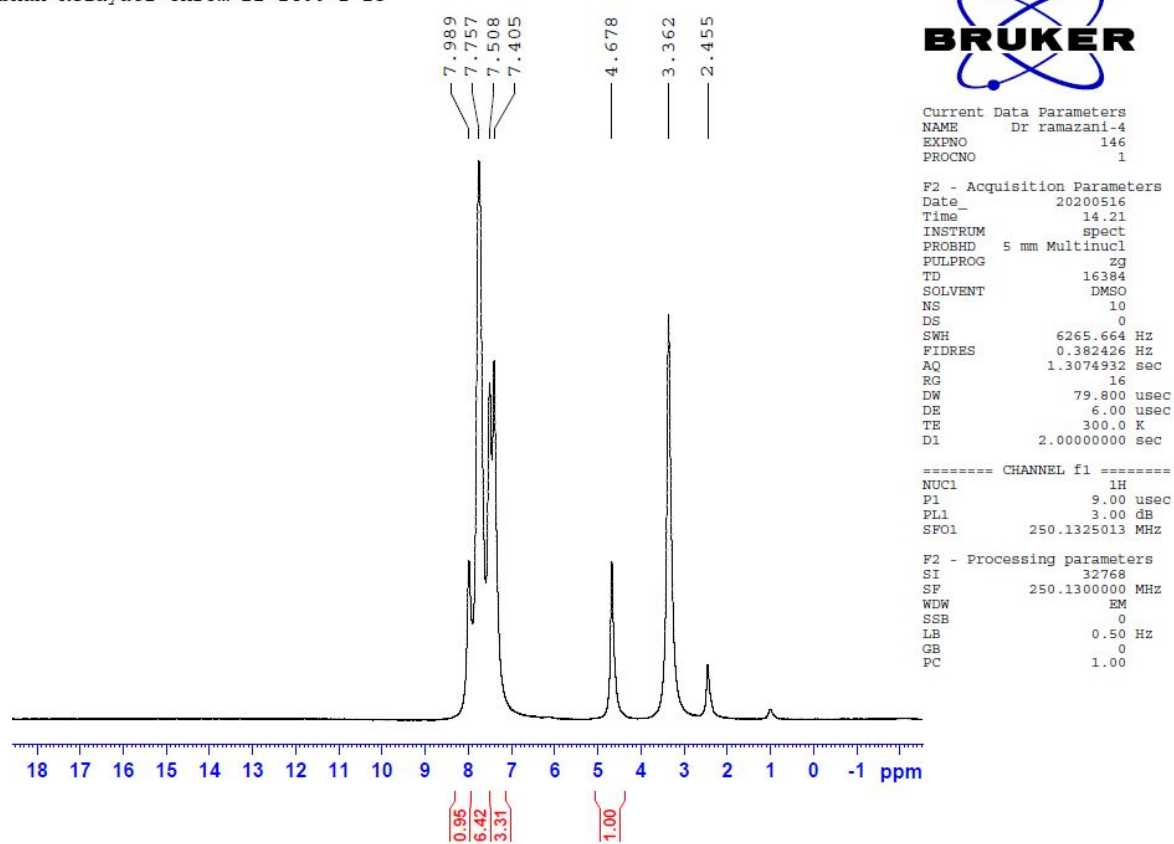

**Figure S30.**  $^1\text{H}$  NMR spectrum of 2-amino-4-(4-cyanophenyl)-5,10-dioxo-5,10-dihydro-4H-benzo[g]chromene-3-carbonitrile

Sobhan-Rezayati-chrom-22-1400-2-25

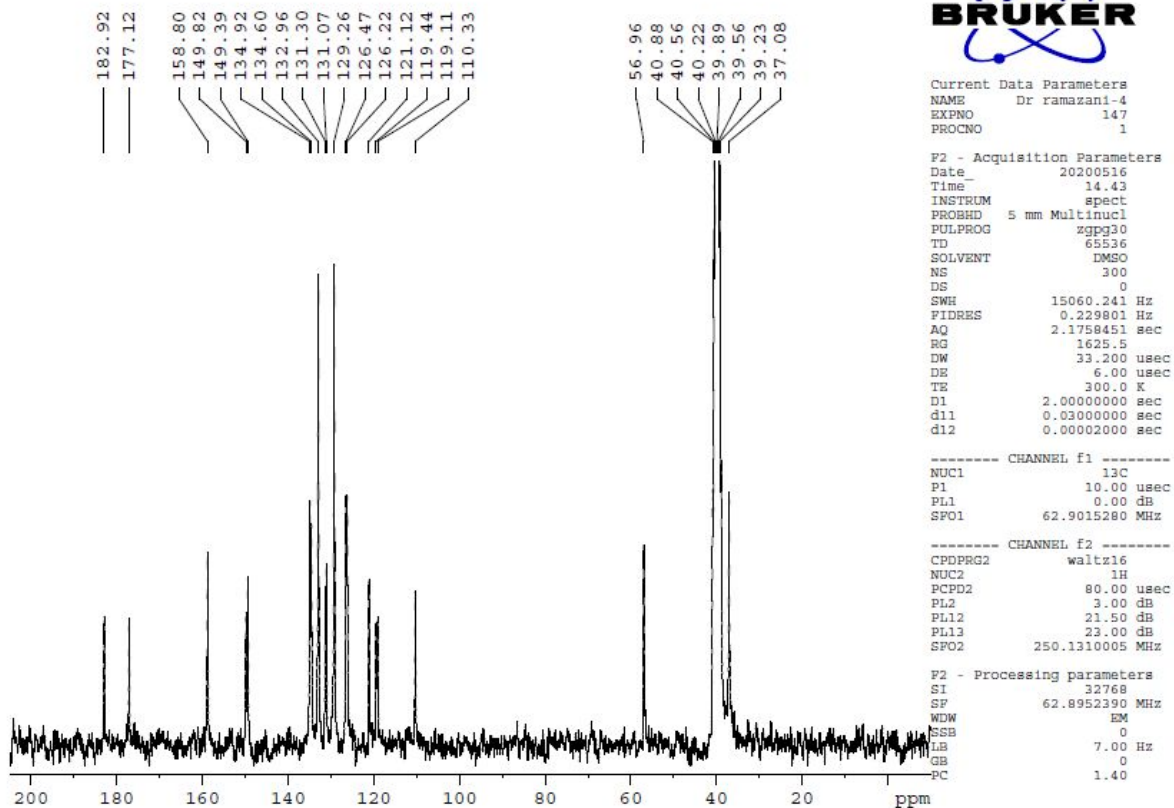

**Figure S31.**  $^{13}\text{C}$  NMR spectrum of 2-amino-4-(4-cyanophenyl)-5,10-dioxo-5,10-dihydro-4H-benzo[g]chromene-3-carbonitrile

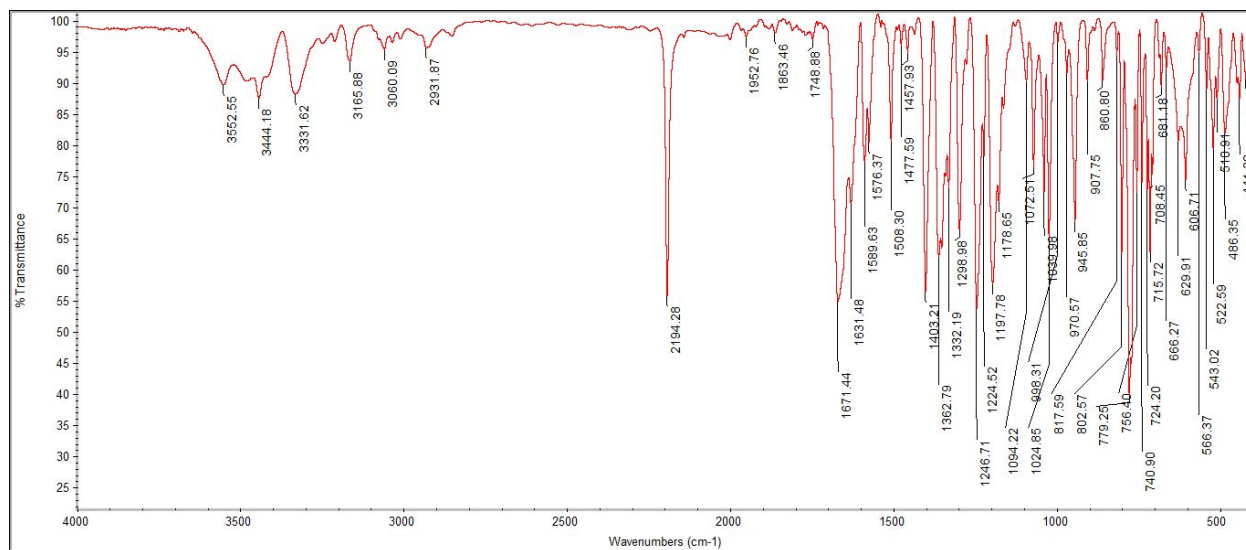

**Figure S32.** FT-IR spectrum of 2-amino-4-(1-naphtyl)-5,10-dioxo-5,10-dihydro-4H-benzo[g]chromene-3-carbonitrile

Rezayati-Chrome-13-1400-2-6

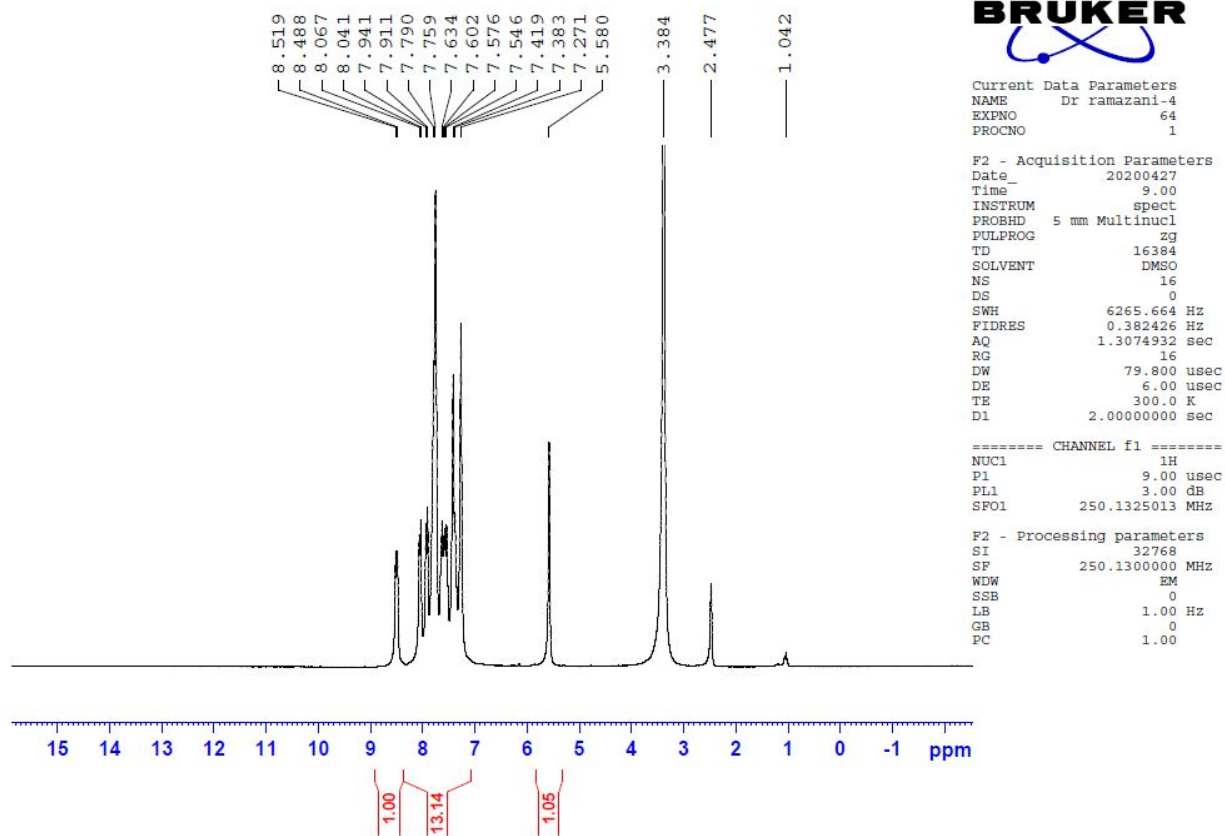

**Figure S33.**  $^1\text{H}$  NMR spectrum of 2-amino-4-(1-naphthyl)-5,10-dioxo-5,10-dihydro-4H-benzo[g]chromene-3-carbonitrile

Rezayati-Chrome-13-1400-2-6

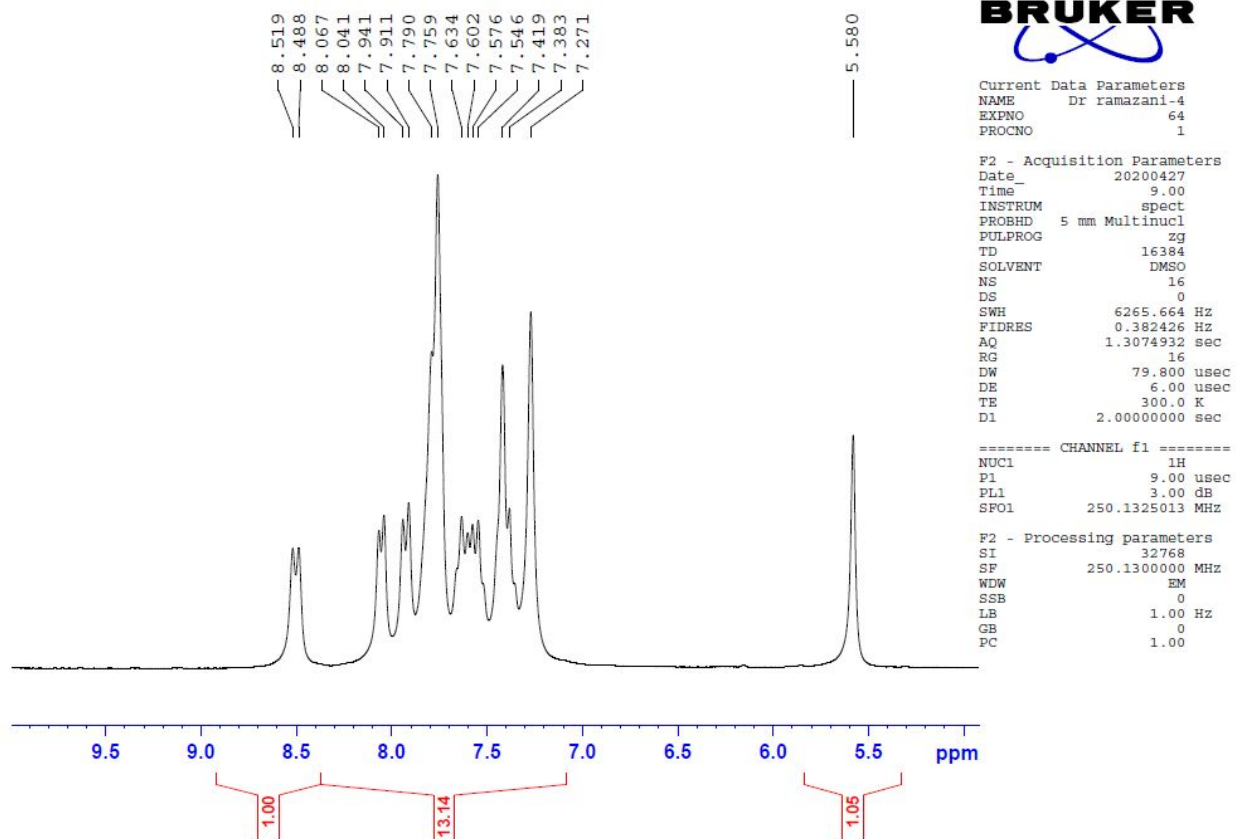

**Figure S34.** The expanded  $^1\text{H}$  NMR spectrum of 2-amino-4-(1-naphthyl)-5,10-dioxo-5,10-dihydro-4*H*-benzo[*g*]chromene-3-carbonitrile

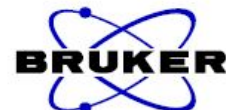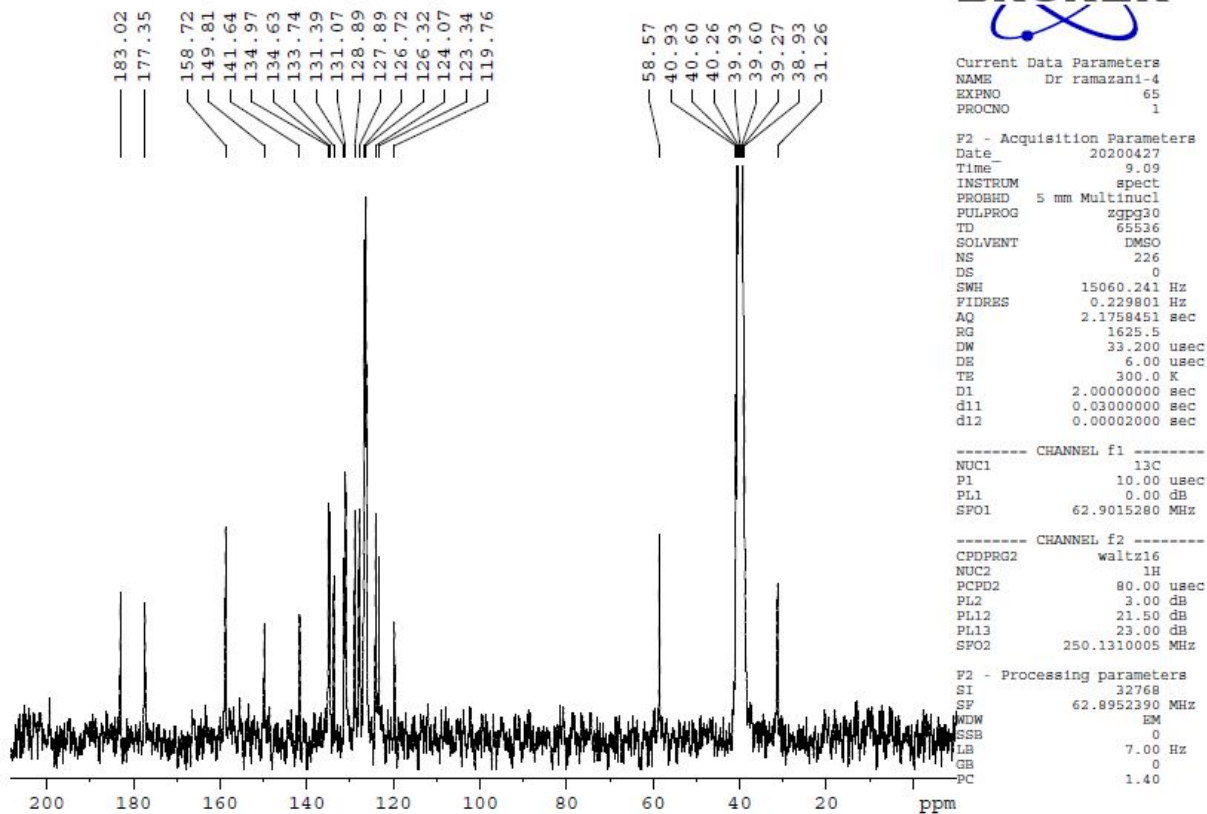

**Figure S35.** <sup>13</sup>C NMR spectrum of 2-amino-4-(1-naphtyl)-5,10-dioxo-5,10-dihydro-4H-benzo[g]chromene-3-carbonitrile



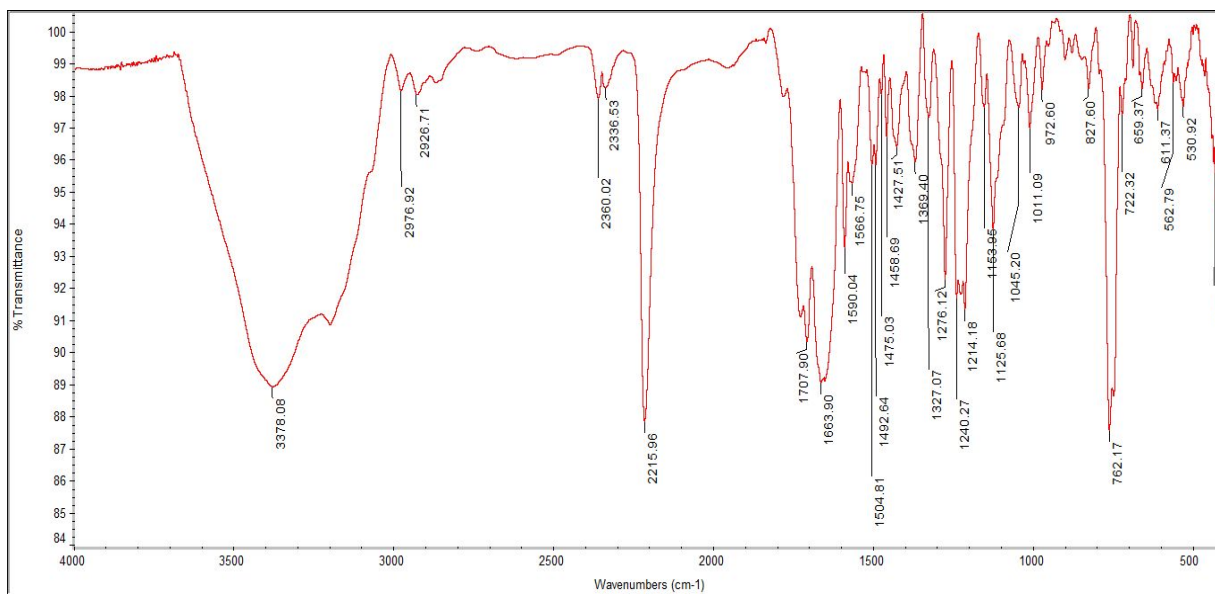

**Figure S36.** FT-IR spectrum of 2-amino-4-(2-naphthyl)-5,10-dioxo-5,10-dihydro-4*H*-benzo[*g*]chromene-3-carbonitrile

Rezayati-Chrome-9-1400-2-6

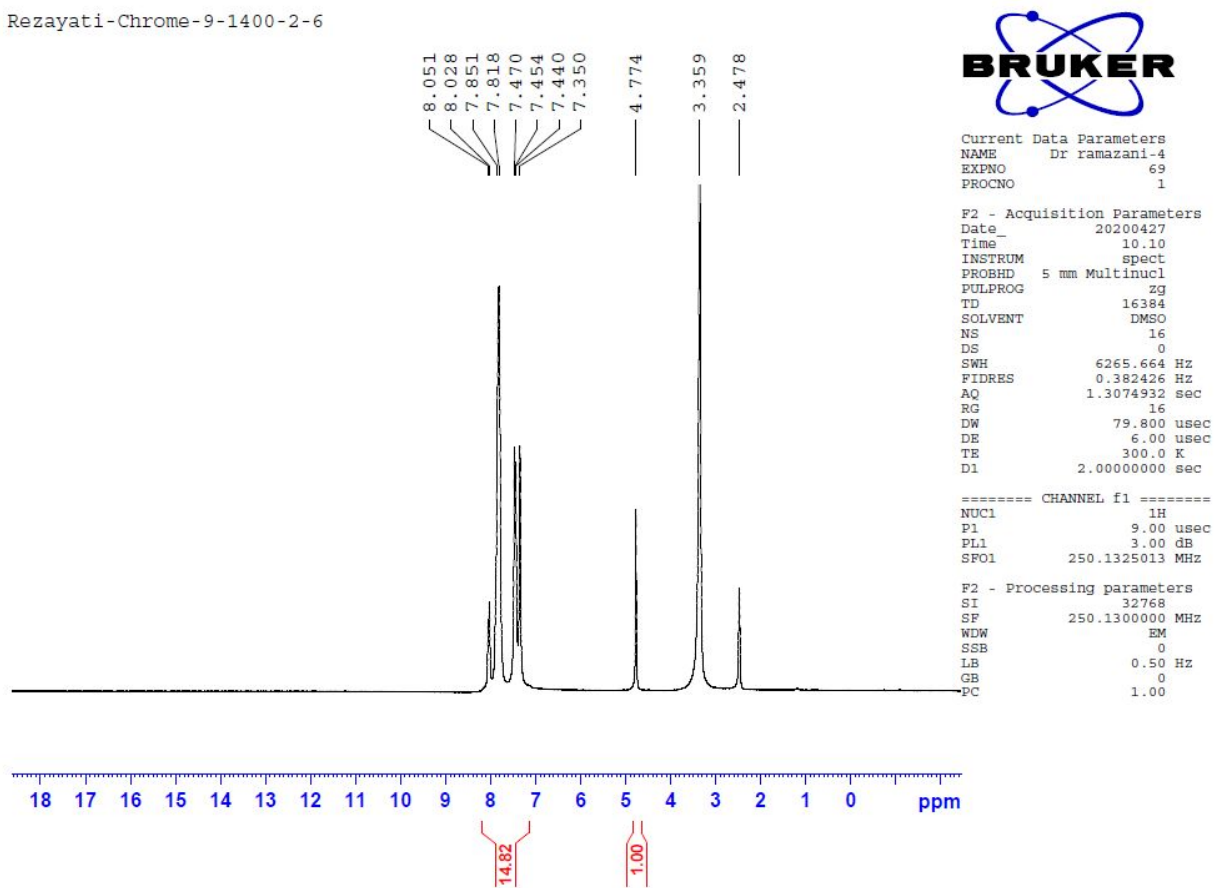

**Figure S37.**  $^1\text{H}$  NMR spectrum of 2-amino-4-(2-naphthyl)-5,10-dioxo-5,10-dihydro-4*H*-benzo[*g*]chromene-3-carbonitrile

Rezayati-Chrome-9-1400-2-6

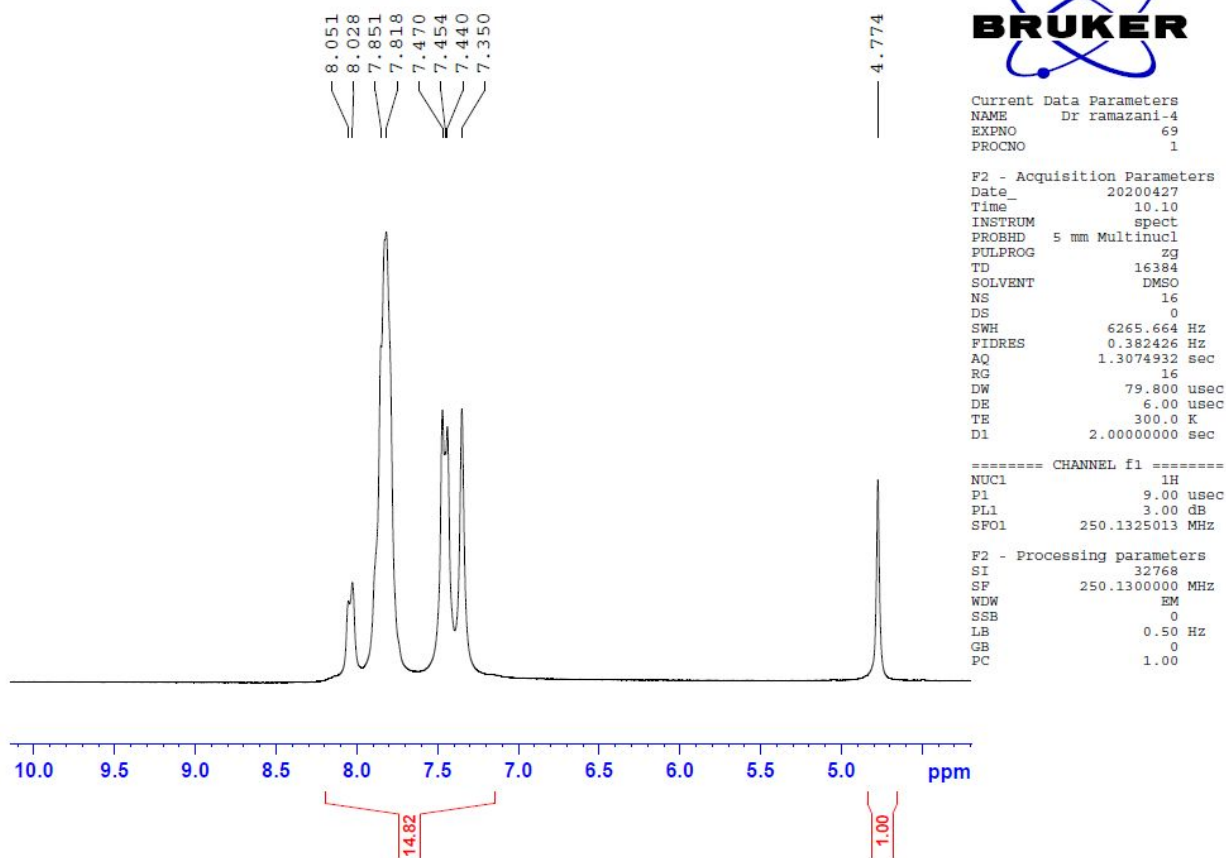

**Figure S38.** The expanded  $^1\text{H}$  NMR spectrum of 2-amino-4-(2-naphthyl)-5,10-dioxo-5,10-dihydro-4*H*-benzo[*g*]chromene-3-carbonitrile

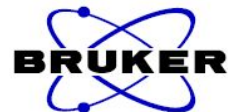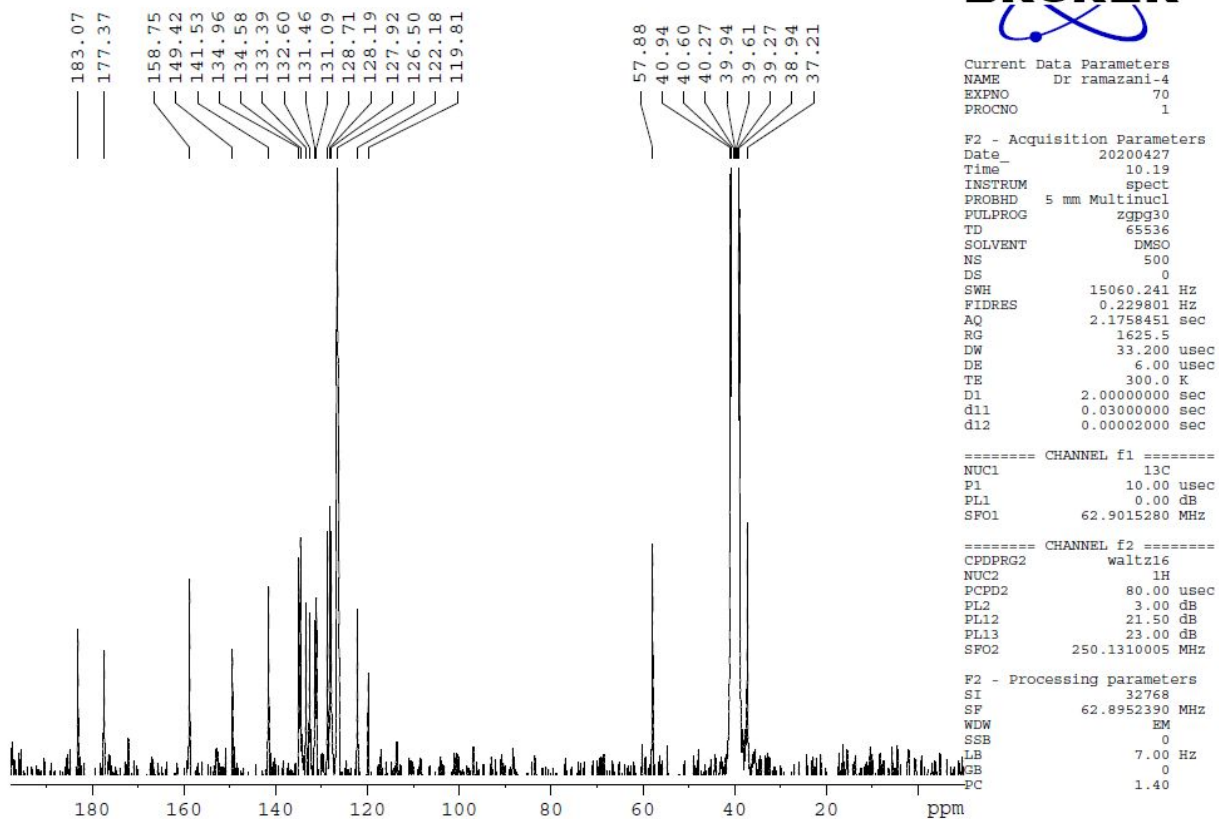

**Figure S39.** <sup>13</sup>C NMR spectrum of 2-amino-4-(2-naphthyl)-5,10-dioxo-5,10-dihydro-4H-benzo[g]chromene-3-carbonitrile

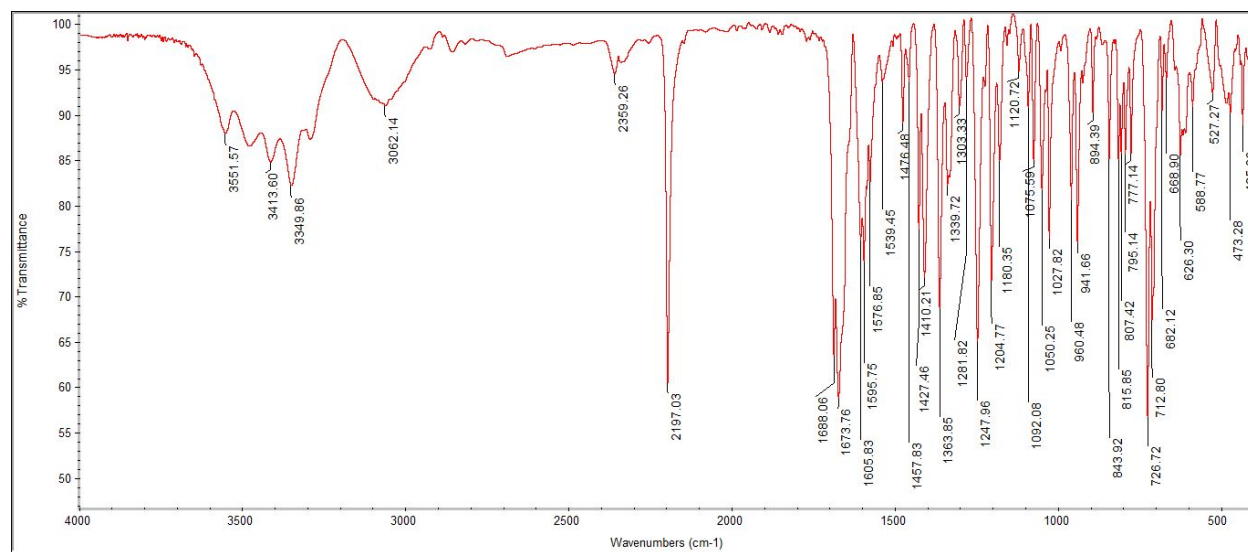

**Figure S40.** FT-IR spectrum of 2-amino-4-(pyridin-3-yl)-5,10-dioxo-5,10-dihydro-4H-benzo[g]chromene-3-carbonitrile

rezayati-chrome-11-1400-2-6

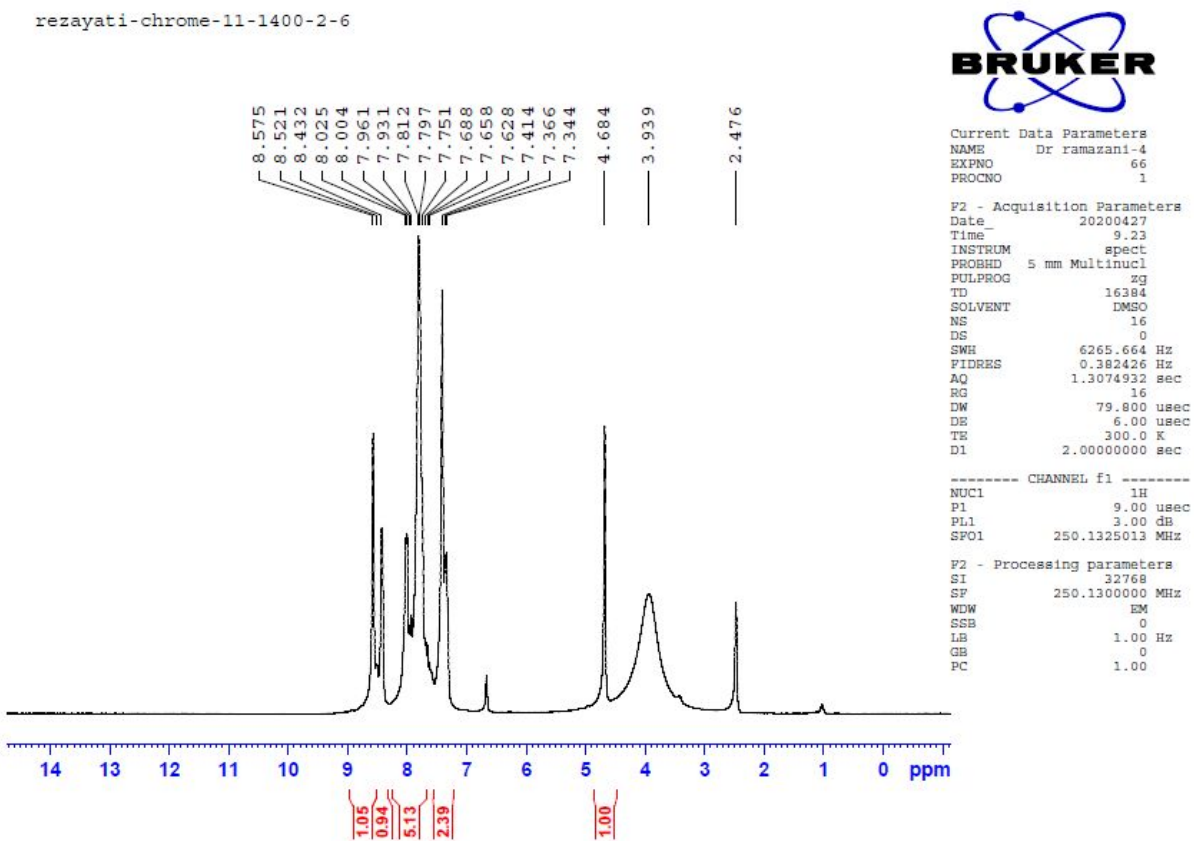

**Figure S41.**  $^1\text{H}$  NMR spectrum of 2-amino-4-(pyridin-3-yl)-5,10-dioxo-5,10-dihydro-4H-benzo[g]chromene-3-carbonitrile

rezayati-chrome-11-1400-2-6

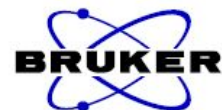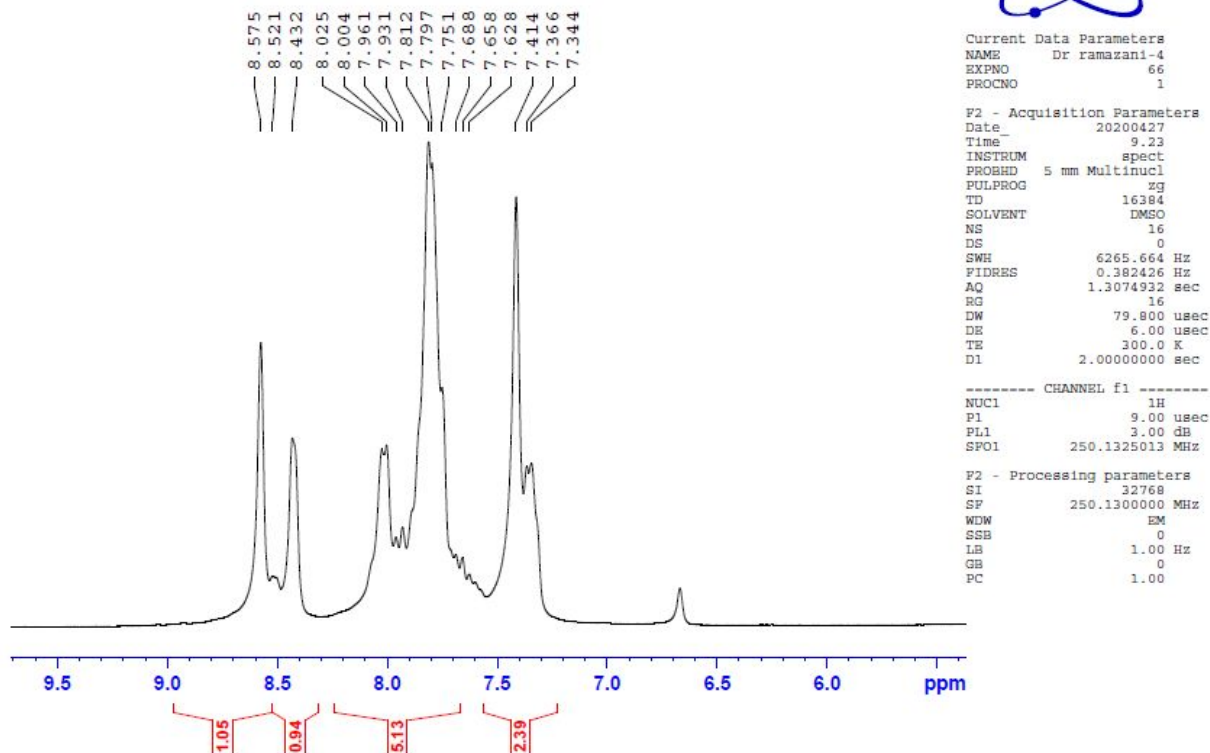

**Figure S42.** The expanded  $^1\text{H}$  NMR spectrum of 2-amino-4-(pyridin-3-yl)-5,10-dioxo-5,10-dihydro-4*H*-benzo[*g*]chromene-3-carbonitrile

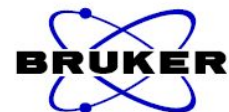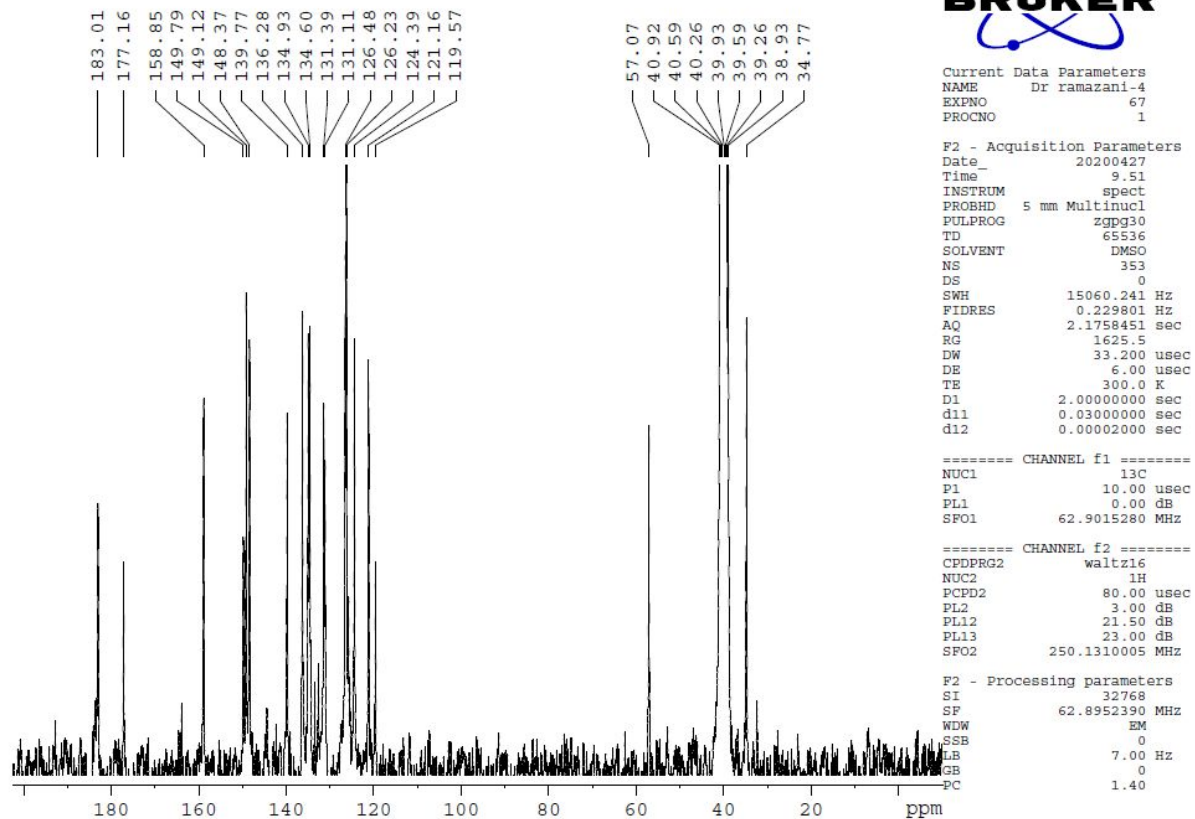

**Figure S43.**  $^{13}\text{C}$  NMR spectrum of 2-amino-4-(pyridin-3-yl)-5,10-dioxo-5,10-dihydro-4H-benzo[g]chromene-3-carbonitrile



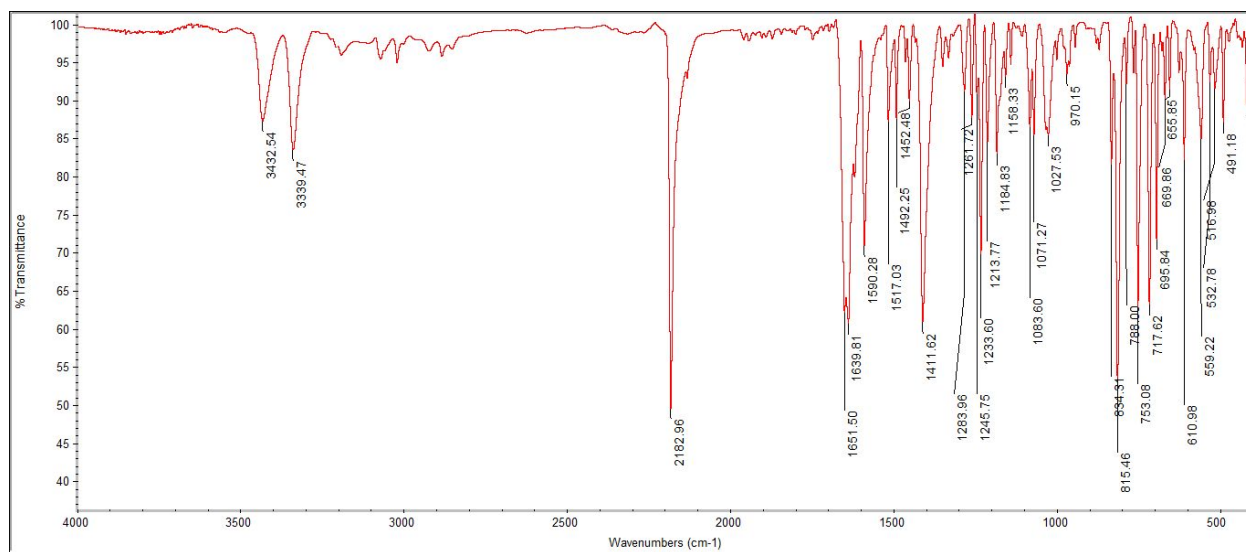

**Figure S44.** FT-IR spectrum of 3-amino-1-phenyl-1H-benzo[f]chromene-2-carbonitrile

sobhan-rezayati-chrom18-1400-2-20

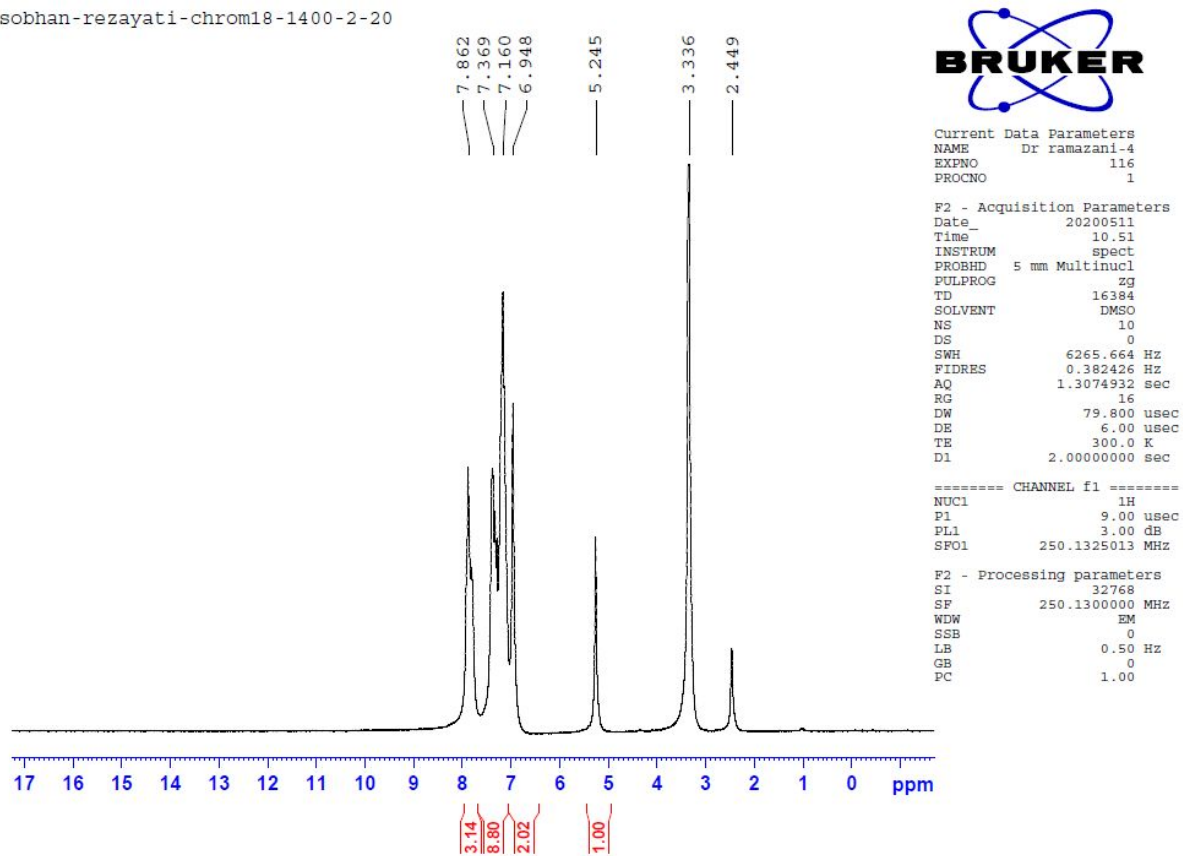

**Figure S45.**  $^1\text{H}$  NMR spectrum of 3-amino-1-phenyl-1H-benzo[f]chromene-2-carbonitrile

sobhan-rezayati-chrom18-1400-2-20

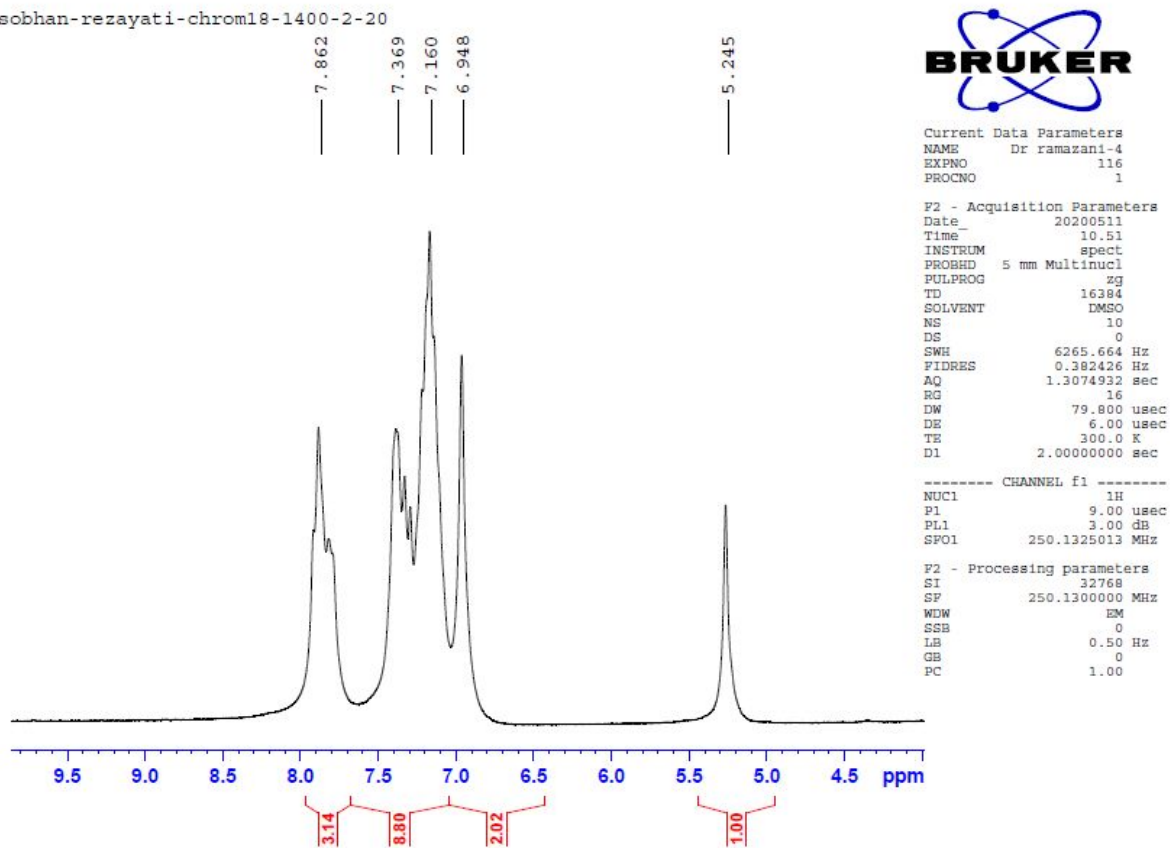

**Figure S46.** The expanded  $^1\text{H}$  NMR spectrum of 3-amino-1-phenyl-1H-benzo[f]chromene-2-carbonitrile

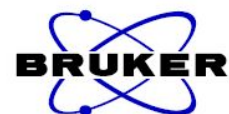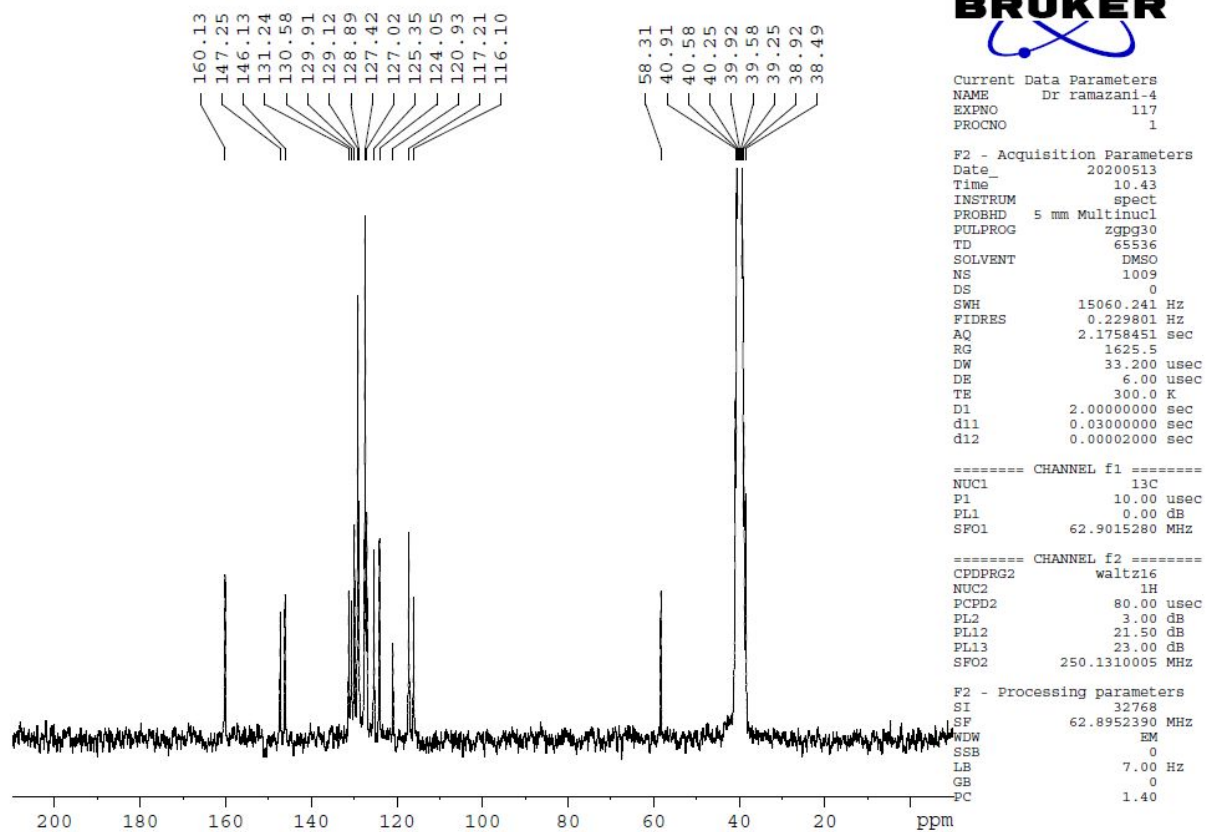

Figure S47. <sup>13</sup>C NMR spectrum of 3-amino-1-phenyl-1H-benzo[f]chromene-2-carbonitrile

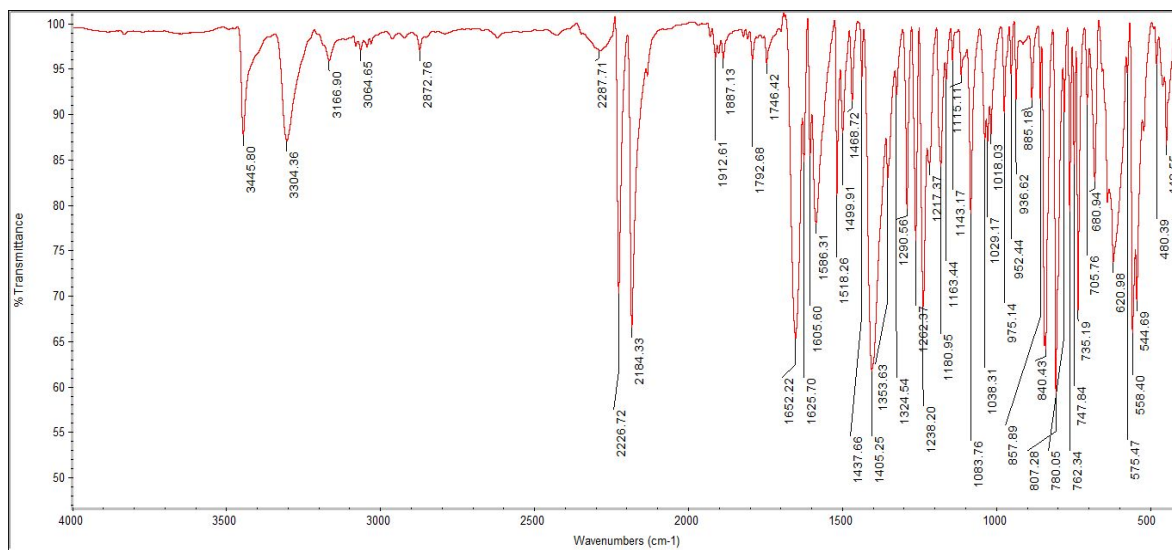

**Figure S48.** FT-IR spectrum of 3-amino-1-(4-cyanophenyl)-1H-benzo[f]chromene-2-carbonitrile (6c)

Sobhan-Rezayati-chrom-19-1400-2-25

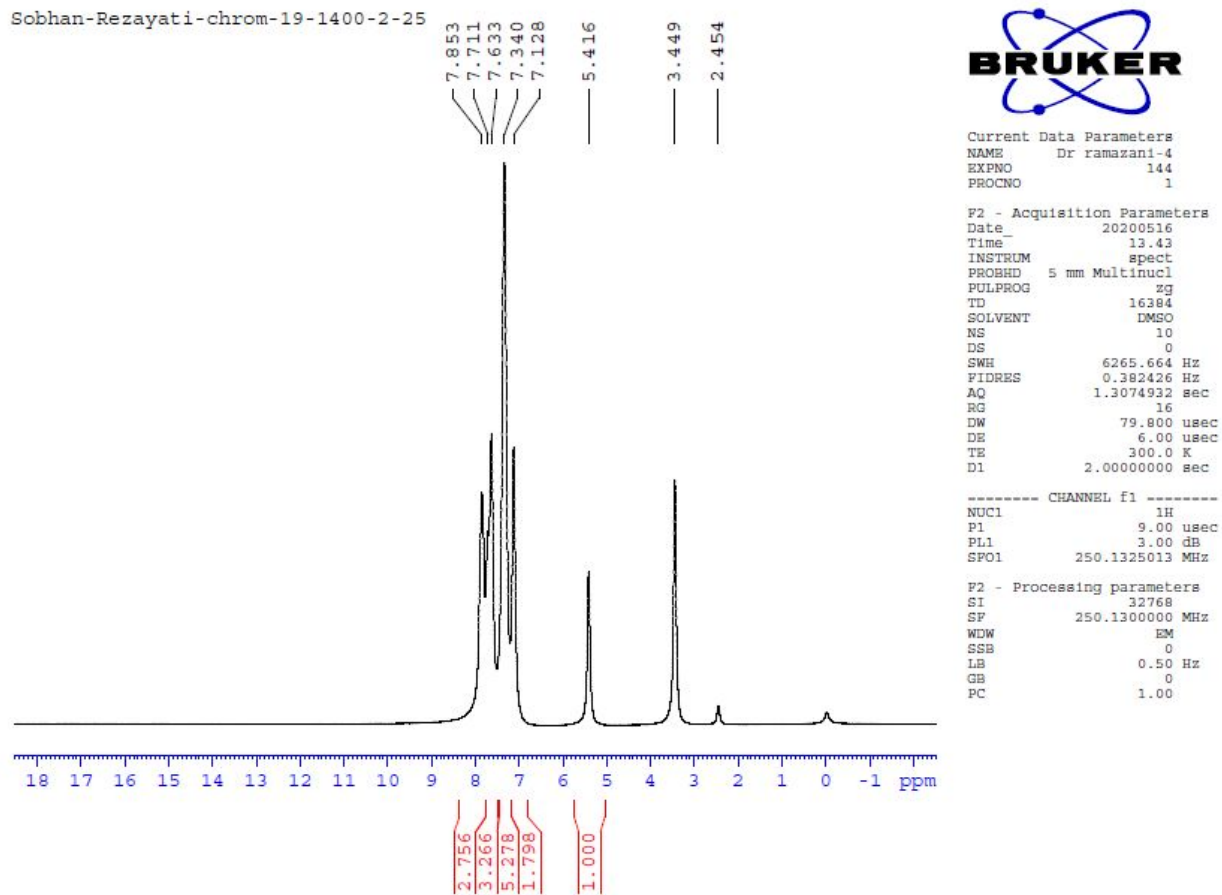

**Figure S49.**  $^1\text{H}$  NMR spectrum of 3-amino-1-(4-cyanophenyl)-1H-benzo[f]chromene-2-carbonitrile

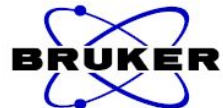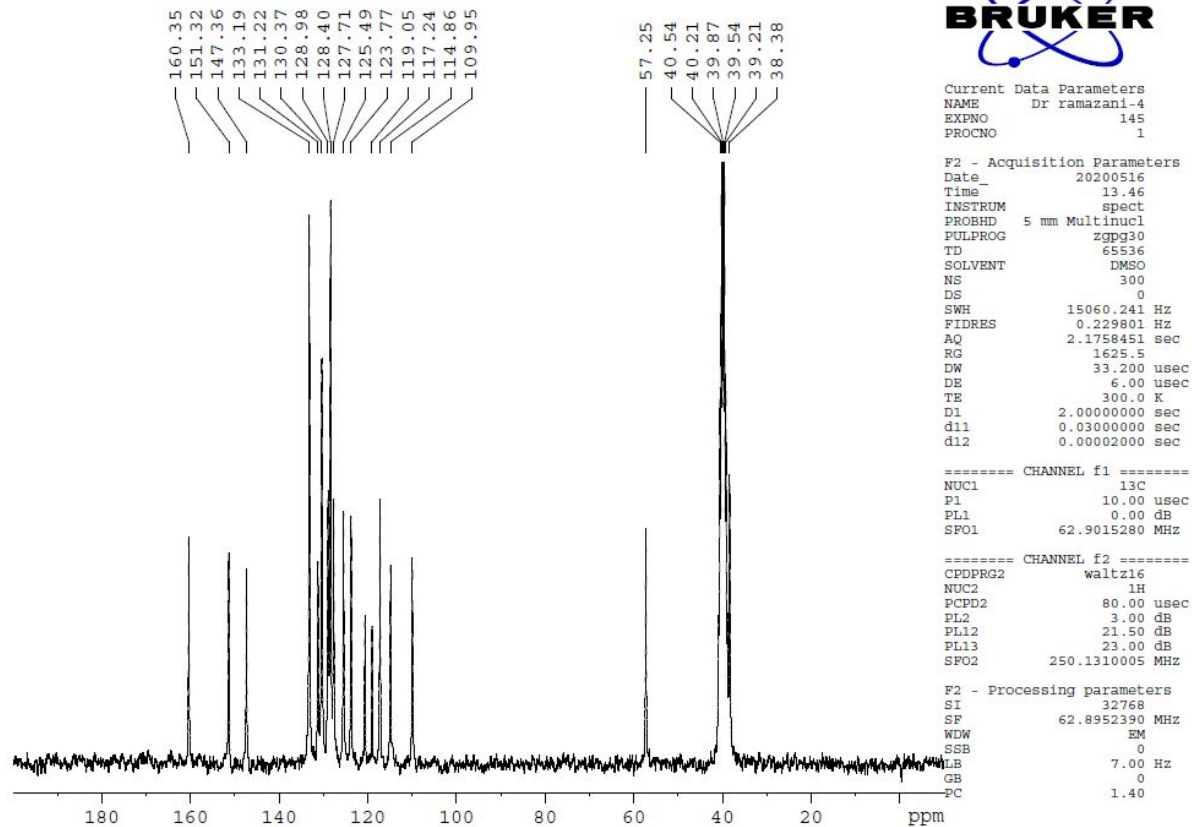

**Figure S50.** <sup>13</sup>C NMR spectrum of 3-amino-1-(4-cyanophenyl)-1H-benzo[f]chromene-2-carbonitrile

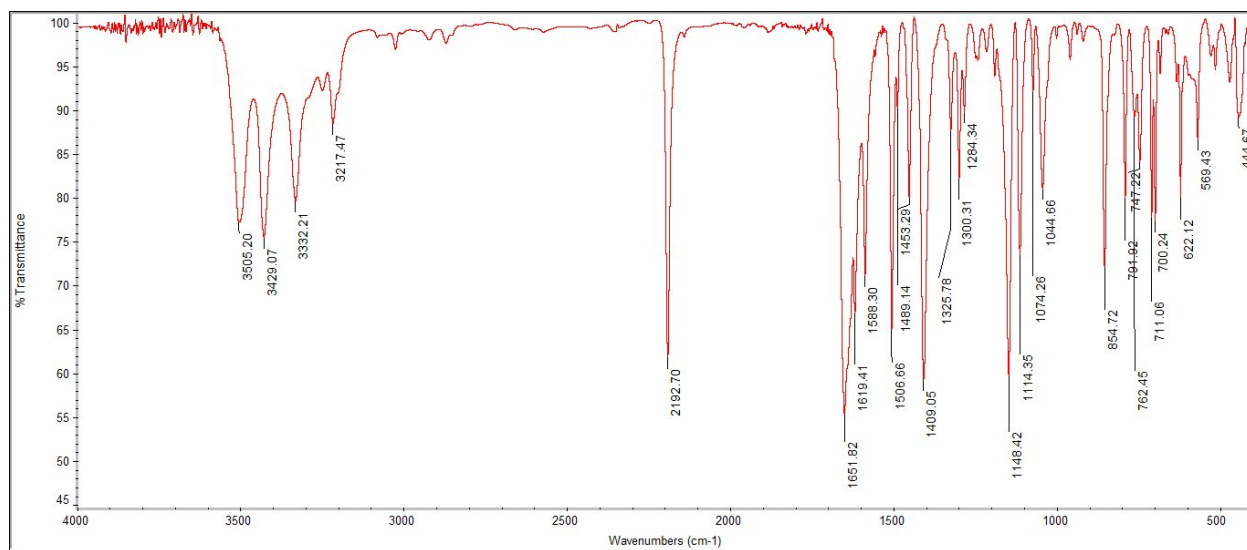

**Figure S51.** FT-IR spectrum of 2-amino-7-hydroxy-4-phenyl-4Hchromene-3-carbonitrile



Sobhan-rezayati-chrom14-1400-2-20

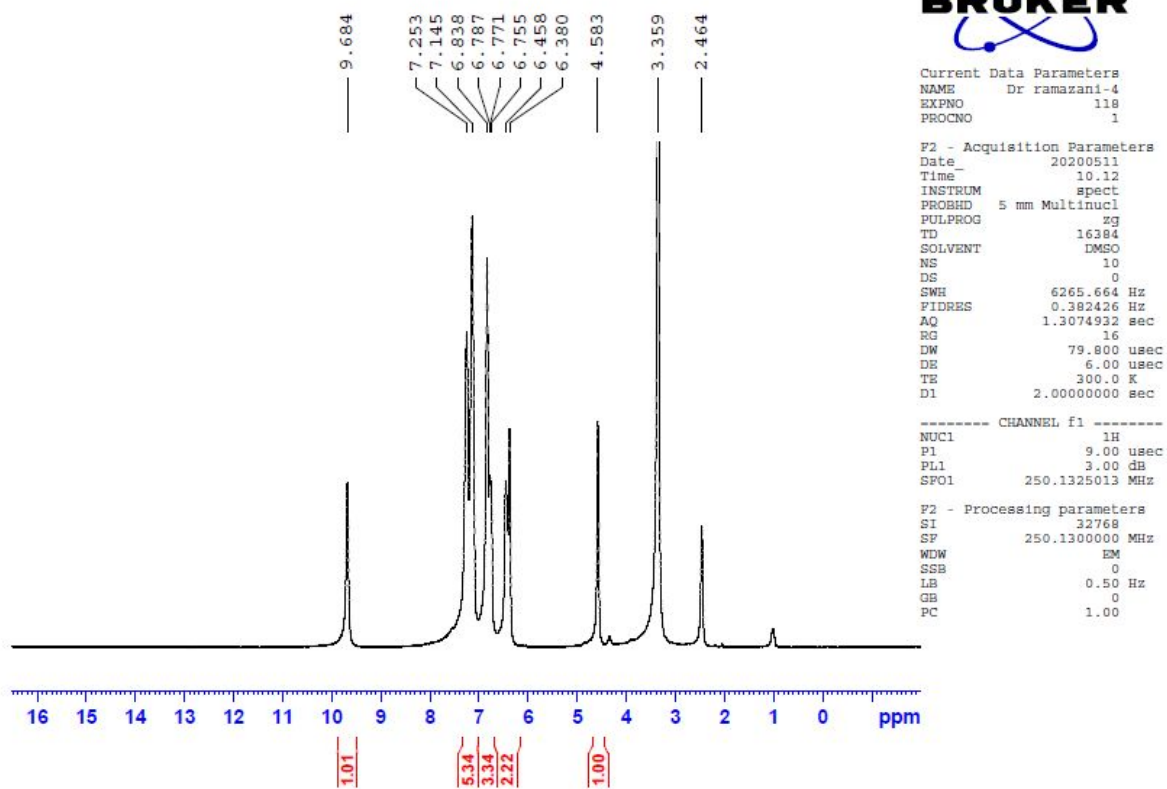

Figure S52. <sup>1</sup>H NMR spectrum of 2-amino-7-hydroxy-4-phenyl-4Hchromene-3-carbonitrile

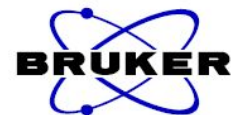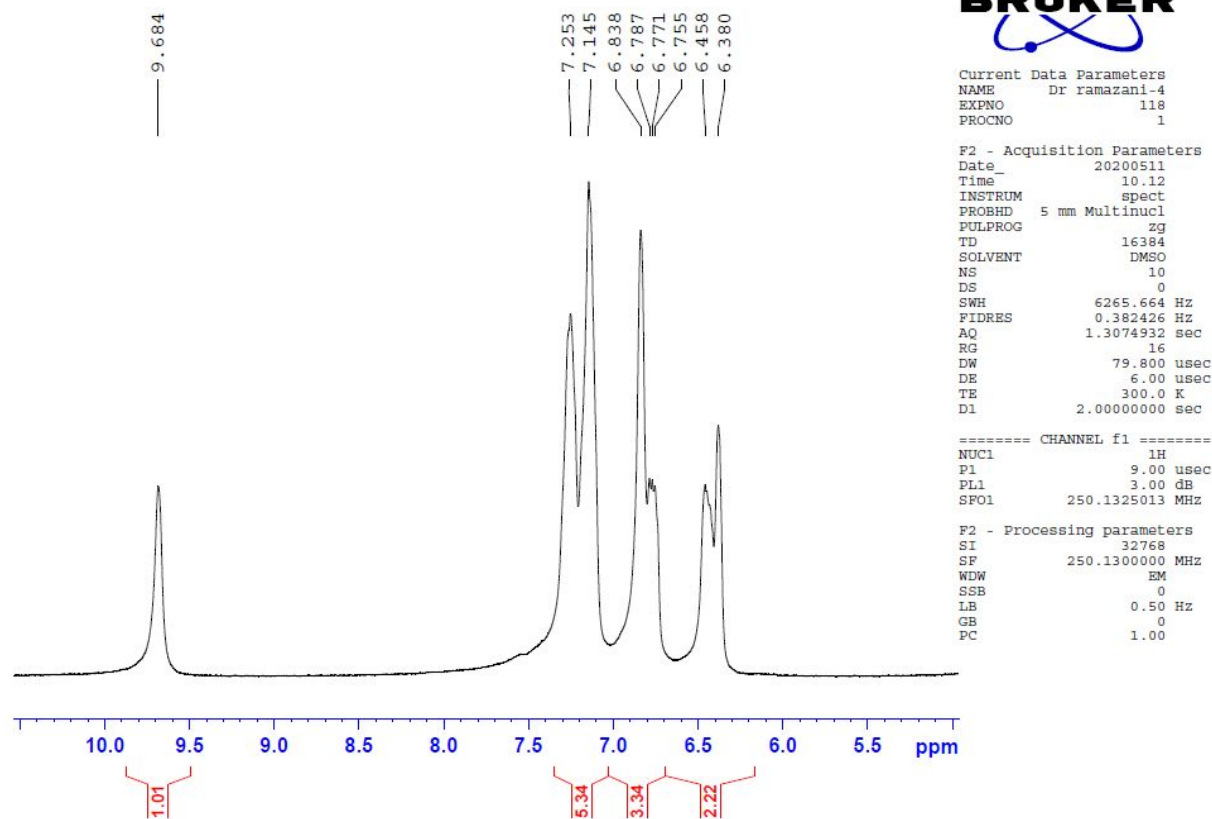

**Figure S53.** <sup>1</sup>H NMR expand spectrum of 2-Amino-7-hydroxy-4-phenyl-4Hchromene-3-carbonitrile

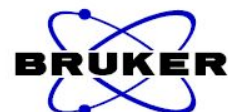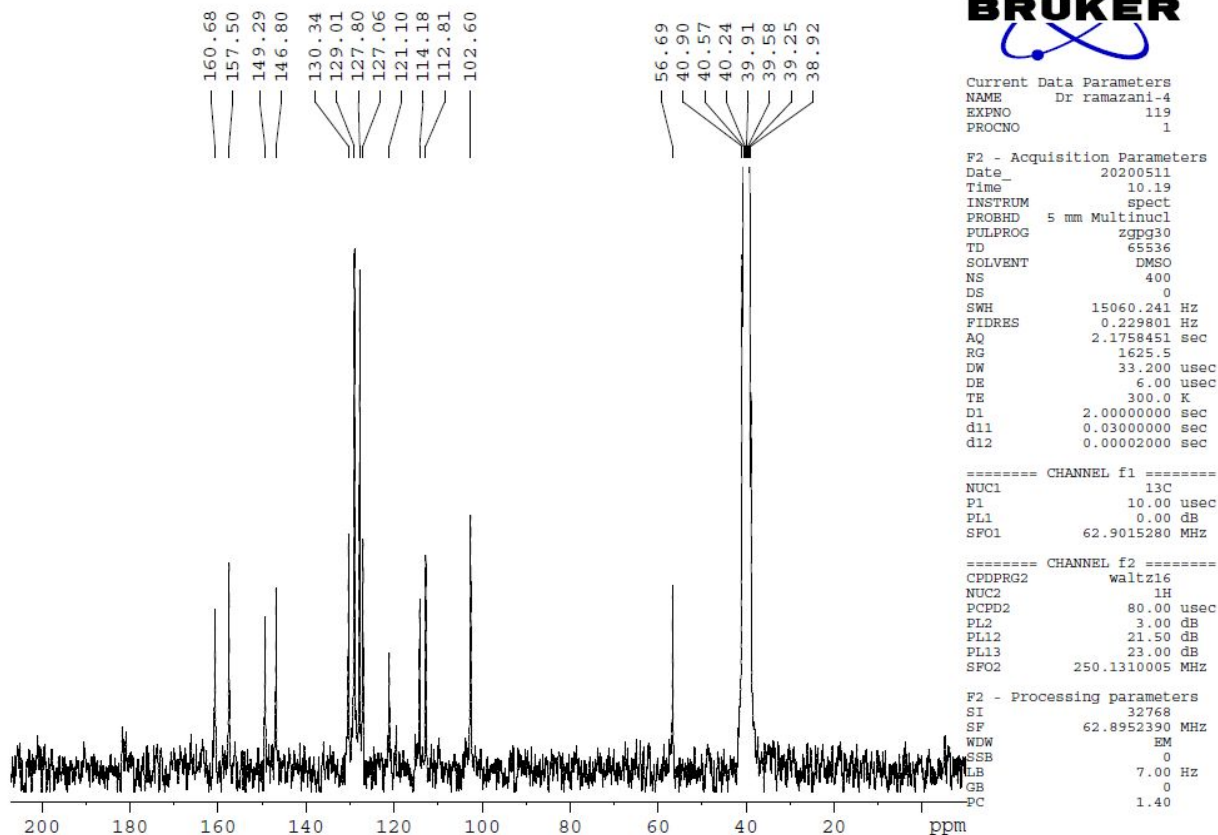

Figure S54. <sup>13</sup>C NMR spectrum of 2-amino-7-hydroxy-4-phenyl-4Hchromene-3-carbonitrile

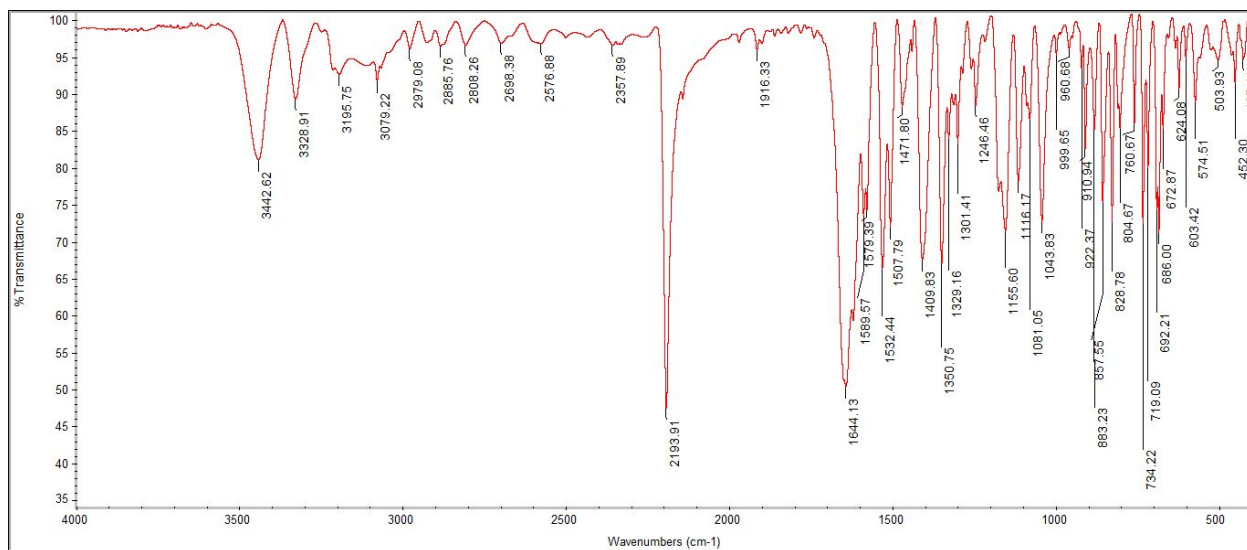

**Figure S55.** FT-IR spectrum of 2-amino-7-hydroxy-4-(3-nitrophenyl)-4*H*-chromene-3-carbonitrile

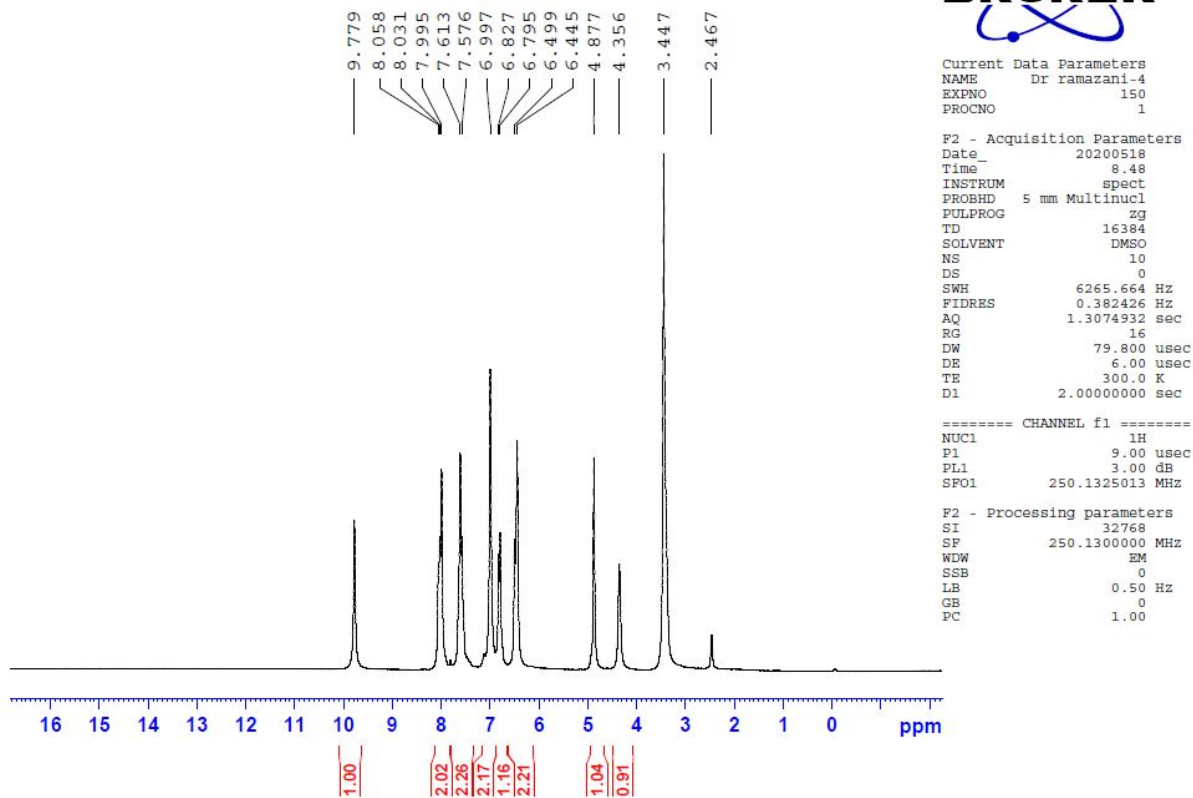

**Figure S56.**  $^1\text{H}$  NMR spectrum of 2-amino-7-hydroxy-4-(3-nitrophenyl)-4*H*-chromene-3-carbonitrile

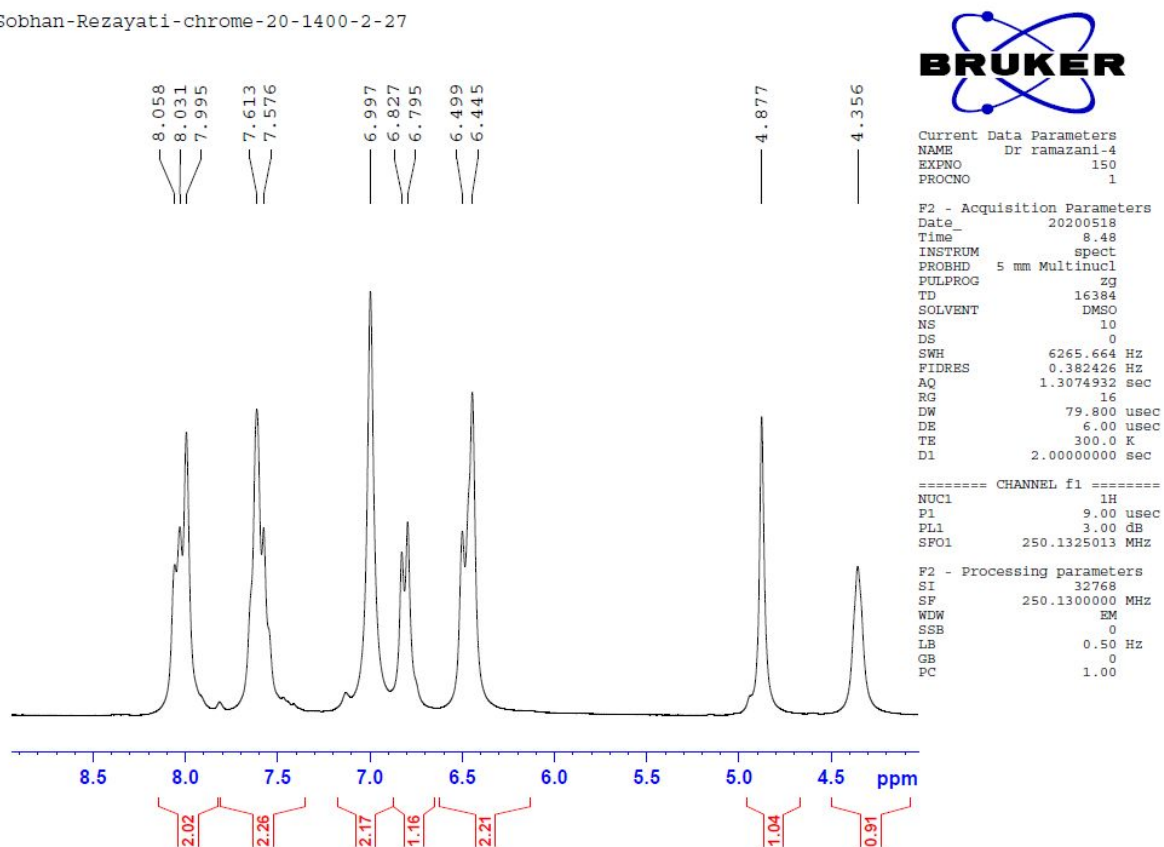

**Figure S57.** The expanded  $^1\text{H}$  NMR spectrum of 2-amino-7-hydroxy-4-(3-nitrophenyl)-4*H*-chromene-3-carbonitrile

Sobhan-Rezayati-chrome-20-1400-2-27

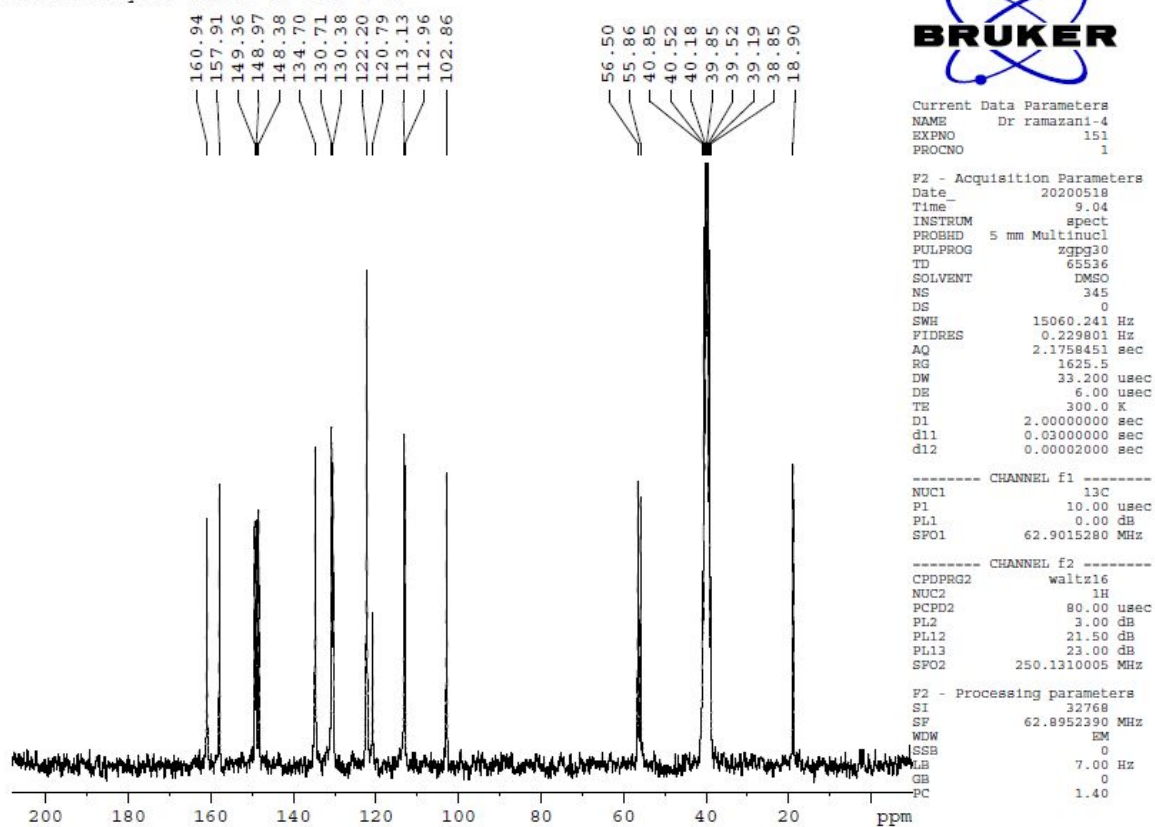

**Figure S58.**  $^{13}\text{C}$  NMR spectrum of 2-amino-7-hydroxy-4-(3-nitrophenyl)-4*H*-chromene-3-carbonitrile
